# Measuring the invisible – The sequences causal of genome size differences in eyebrights (*Euphrasia*) revealed by k-mers

1 **Hannes Becher<sup>1\*</sup>, Jacob Sampson<sup>1</sup>, Alex D. Twyford<sup>1,2</sup>**

2 <sup>1</sup>Institute of Evolutionary Biology, School of Biological Sciences, University of Edinburgh,  
3 Edinburgh, United Kingdom

4 <sup>2</sup>Royal Botanic Gardens Edinburgh, Edinburgh, United Kingdom

5 **\* Correspondence:**

6 Corresponding Author

7 hannesbecher [squiggly ‘a’] gmail [small ‘point’] com

8 **Keywords: k-mers, genome size, *Euphrasia*, structural variation, genomic satellite, copy-**  
9 **number, transposable element. (Min.5-Max. 8)**

## 10 **Abstract**

11 Genome size variation within plant (and other) taxa may be due to presence/absence variation in low-  
12 copy sequences or copy number variation in genomic repeats of various frequency classes. However,  
13 identifying the sequences underpinning genome size variation has been challenging because genome  
14 assemblies commonly contain collapsed representations of repetitive sequences and because genome  
15 skimming studies miss low-copy number sequences.

16  
17 Here, we take a novel approach based on k-mers, short sub-sequences of equal length  $k$ , generated  
18 from whole genome sequencing data of diploid eyebrights (*Euphrasia*), a group of plants which have  
19 considerable genome size variation within a ploidy level. We compare k-mer inventories within and  
20 between closely related species, and quantify the contribution of different copy number classes to  
21 genome size differences. We further assign high-copy number k-mers to specific repeat types as  
22 retrieved from the RepeatExplorer2 pipeline.

23  
24 We find complex patterns of k-mer differences between samples. While all copy number classes  
25 contributed to genome size variation, the largest contribution came from repeats with 1000-10,000  
26 genomic copies including the 45S rDNA satellite DNA and, unexpectedly, a repeat associated with  
27 an *Angela* transposable element. We also find size differences in the low-copy number class, likely  
28 indicating differences in gene space between our samples.

29  
30 In this study, we demonstrate that it is possible to pinpoint the sequences causing genome size  
31 variation within species without use of a reference genome. Such sequences can serve as targets for  
32 future cytogenetic studies. We also show that studies of genome size variation should go beyond  
33 repeats and consider the whole genome. To allow future work with other taxonomic groups, we share  
34 our analysis pipeline, which is straightforward to run, relying largely on standard GNU command  
35 line tools.

36  
37  
38  
39

## 40 1 Introduction

41 Over the past century, cytogeneticists have uncovered various genomic phenomena such as repetitive  
42 neocentromeres ‘knobs’ (e.g. Creighton and McClintock, 1931), heterochromatin (Heitz, 1928), and B  
43 chromosomes (Jones, 1995 and references therein). These are all associated with structural genomic  
44 variation, genomic repeats, and they contribute to genome size variation. As recent and ongoing  
45 advances in DNA sequencing technology have revolutionised the community’s ability to characterise  
46 the genetic variation on the sequence level, it is now possible to study, at unprecedented detail, the  
47 sequences underpinning genome size variation within and between closely related species.

48  
49 Genome size is a trait immediately shaped by structural genomic variation. E.g., a deletion of a part  
50 of the genome causes a smaller genome size. Because of the ubiquity in populations of structural  
51 genomic variation such as ploidy differences, supernumerary chromosomes, segmental duplications,  
52 and other ‘indels’, the assumption of intraspecific genome size variation should be the norm.  
53 However, the magnitude of this variation and whether it can be detected by methods such as  
54 microdensitometry or flow cytometry has been subject to debate, and some older reports have been  
55 refuted (Greilhuber, 2005; Suda and Leitch, 2010). Nevertheless, studies following best practices and  
56 using internal reference standards have revealed genome size variation in numerous species  
57 (Achigan-Dako et al., 2008; Šmarda et al., 2010; Díez et al., 2013; Hanušová et al., 2014;  
58 Blommaert, 2020).

59  
60 Between the species of embryophyte plants, genome size shows a staggering 2400-fold variation  
61 (Pellicer et al., 2018). Within this range, larger genome size is generally associated with higher  
62 proportions of genomic repeats as evidenced by low-pass sequencing studies, although genome  
63 repetitiveness decreases somewhat in the species with the largest genomes (Novák et al., 2020a). The  
64 repeats accounting for most of the DNA in plant genomes can be classified in two categories:  
65 interspersed and tandem (satellite) repeats (Heslop-Harrison and Schwarzacher, 2011) both of which  
66 may affect genome evolution in characteristic ways. Interspersed repeats correspond to transposable  
67 elements (transposons) which due to their copy-and-paste (or cut-and-paste) nature can insert  
68 themselves into distant parts of the genome. Crossing over between such elements can lead to  
69 chromosomal rearrangements, associated with DNA loss or duplication, reviewed in Charlesworth et  
70 al. (1994). Over evolutionary time, there may be bursts of transposon activity (e.g. Jiménez-Ruiz et  
71 al., 2020) possibly triggered by hybridisation (Petit et al., 2010), but short-term change of their copy  
72 numbers is usually low. Satellite repeats on the other hand consist of numerous copies arranged in a  
73 head-to-tail fashion. Although some satellite repeats are extremely conserved (Abad et al., 1992),  
74 they are generally known for rapid changes in copy number and sequence identity between species.  
75 This was characterised, in detail, in *Nicotiana* by Kovarik et al. (2008) and Koukalova et al. (2010),  
76 and there are numerous other examples for satellite variation between related species (Tek et al.,  
77 2005; Ambrozová et al., 2011; Becher et al., 2014; Ávila Robledillo et al., 2020), within populations  
78 (Veltsos et al., 2009; Rabanal et al., 2017), and between the sub-genomes of allopolyploids (Heitkam  
79 et al., 2020). Satellite copy number has been shown to correlate with genome size for instance in the  
80 case of rDNA arrays (Davison et al., 2007; Long et al., 2013) and maize chromosomal knobs (Chia et  
81 al., 2012).

82  
83 Despite the highly advanced state of DNA sequencing and the existence of genome assemblies for  
84 many species, it is still challenging to pinpoint the genomic sequences underlying intraspecific  
85 genome size variation. This is because structural variation commonly includes genomic repeats,  
86 which are often misassembled or missing even in high-quality genome assemblies. Alternative  
87 approaches based on low-pass sequencing by design miss low-copy number sequences. In this article,

88 we will demonstrate that comparing the k-mer sets of two individuals allows one to pinpoint in a  
89 straightforward way which sequences and genomic copy number classes contribute to genome size  
90 differences.

91  
92 The most familiar representation of an individual-sample k-mer dataset is perhaps a k-mer spectrum  
93 as depicted in Fig. 1A. This spectrum plot of the diploid *Euphrasia rostkoviana* shows for each  
94 multiplicity level (x axis, number of times a specific k-mer is seen) how many different k-mers there  
95 were (y axis). For instance, of k-mers that were observed approximately 130 times there were  
96 approximately 3 million different ones (at the tip of the ‘diploid peak’). These k-mers correspond to  
97 sequences that were identical between the two genome copies in this diploid individual. There is also  
98 a monoploid peak containing sequences present only in one genome only such as caused by  
99 heterozygous sites. Repeats are not covered by this plot, which is cropped at multiplicity 200, just  
100 above the diploid level. To represent all a genome’s k-mers, an ‘un-cropped’ k-mer spectrum may be  
101 plotted with logarithmic axes as in Fig. 1B. Here, the x-axis is labelled with both multiplicity values  
102 (black) and the corresponding genomic copy number (grey). The ratio between multiplicity and  
103 genomic copy number depends on each individual sample’s sequencing depth. If samples are to be  
104 compared, each sample’s multiplicity values must be re-scaled to a common scale, a natural scale  
105 being the genomic copy number. To reduce the range of copy number values that are compared, the  
106 data may be binned as shown in Fig. 1C, which reduces the number of comparison points to  
107 approximately 130 bins (from several 100,000 in Fig. 1B). Because binning is carried out after  
108 scaling, a bin number corresponds to the same genomic copy number (range) in all samples.  
109

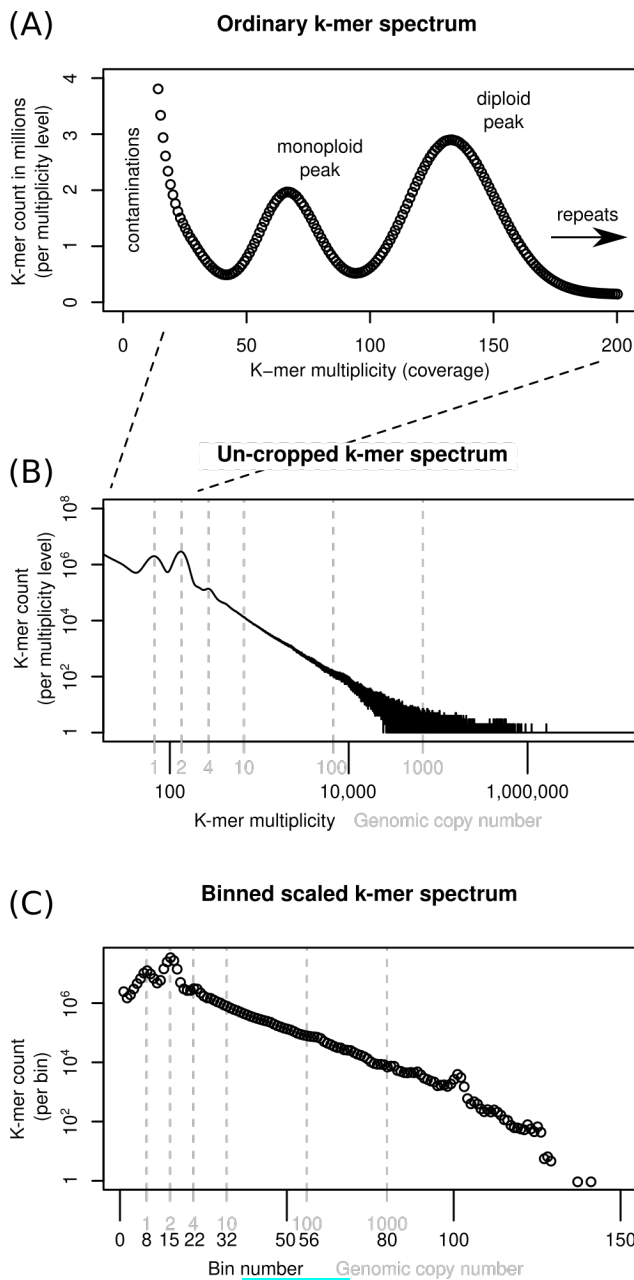

110  
 111 [half-page width] **Figure 1.** Ways of depicting individual-sample k-mer data sets. Panel (A) shows a  
 112 k-mer spectrum with linear axes and the multiplicity (x-axis) cropped at 200, excluding k-mers  
 113 present in genomic repeats. To represent all sample k-mers, the axes may be scaled logarithmically as  
 114 in (B). To compare samples, the multiplicity values can be scaled and binned (C). See main text for  
 115 more detail. [end legend fig. 1]

116  
 117  
 118 Several hypotheses exist as to the sequences causal for genome size differences in closely related  
 119 species and populations. Here, we investigate three hypotheses, which are not mutually exclusive. (1)  
 120 Genome size difference may be due to satellite repeats. Satellite repeats are known for their  
 121 propensity for rapid copy number change as mentioned above and are thus natural ‘suspects’ for  
 122 causing genome size differences. (2) Differences may be caused by sequences ‘across the board’ – all  
 123 kinds of sequence proportional to their genomic copy number. Recombination between distant repeat  
 124 element may cause the duplication, loss, or translocation of larger chromosome fragments resulting in

125 copy number changes of numerous sequences ‘across the board’ (Vitales et al., 2020). (3) Size  
126 differences may be due to low-copy number sequences. Numerous pangenome studies have found  
127 variation in low-copy number sequences between individuals of the same or closely related species.  
128

129 In this study, we use high-coverage shotgun data to investigate the sequences underlying genome size  
130 variation in diploid British eyebrights (*Euphrasia* L.) in which we had previously uncovered  
131 considerable intraspecific genome size variation (Becher et al., 2021). These diploids from a complex  
132 of hybridising taxa, which are not distinguishable by DNA barcoding (Wang et al., 2018) albeit there  
133 is some genetic structure congruent with morphological difference as evidenced by AFLPs (French et  
134 al., 2008). We intentionally avoid using assembly-based approaches. Instead, we compare genome  
135 size and genome composition by means of k-mers allowing us to cover the whole spectrum of  
136 genomic repetitiveness classes.  
137

## 138 2 Materials and Methods

### 139 2.1 The study system

140 Eyebrights (*Euphrasia* L., Orobanchaceae) are a genus of facultative hemiparasitic plants with a  
141 largely bipolar distribution (Gussarova et al., 2008). All British members of the genus are summer  
142 annuals. There are two levels of ploidy known in British eyebrights (*Euphrasia*) – diploid and  
143 tetraploid. The diploids tend to have large showy flowers showing a correlation between flower size  
144 and degree of outbreeding (French et al., 2005). They carry an indumentum of long glandular hairs  
145 and are largely restricted to England and Wales (Metherell and Rumsey, 2018). Tetraploids tend to  
146 have smaller flowers, they can have glandular hairs, too, which are then always short, and they occur  
147 throughout Britain. Interploidy hybridisation in British eyebrights has been suggested by Peter Yeo,  
148 who argued that the diploids *E. vigursii* and *E. rivularis* originated from inter-ploidy hybridisation  
149 (Yeo, 1956). So far, only one triploid individual has been confirmed by cytogenetics (Yeo, 1954). In  
150 this study, we focus on morphological diploids in which we have previously found 1.2-fold genome  
151 size variation (Becher et al., 2021).  
152

### 153 2.2 Sampling and sequencing

154 To complement previously generated data (An1, Vi, Ro, and Ri1, see [Table 1](#)), we collected  
155 morphological diploids in the field and stored samples individually in silica gel for desiccation (see  
156 [Table 1 for details](#)). We used the UK grid reference finder (<https://gridreferencefinder.com>) to  
157 convert all sample locations. In total, our sampling covered a  
158 geographic range of 570 km (Vi-Ro). Where we included multiple individuals per species, each  
159 individual came from a different population with the closest pair of samples being Ri1 and Ri2  
160 collect 2.5 km apart ([Table 2](#)).  
161

162 We extracted DNA using a DNeasy Plant Mini Kit (Qiagen, Manchester, UK) according to the  
163 manufacturer’s instructions. PCR-based libraries were constructed by Edinburgh Genomics, who  
164 generated 150-bp paired-end reads on an Illumina NovaSeq6000 instrument.  
165

166 [placeholder] [Table 1](#).

| ID  | Species                      | Read length | Ploi* | Cov* | NCBI ID      | % het* | GS (Mbp)* | GS Diff <sup>‡</sup> | Platform <sup>†</sup> | Lat/Long      | 1C (pg) <sup>‡</sup> |
|-----|------------------------------|-------------|-------|------|--------------|--------|-----------|----------------------|-----------------------|---------------|----------------------|
| An1 | <i>Euphrasia anglica</i>     | 2 x 250bp   | 2     | 54   | SAMN14582932 | 0.13   | 999.98    | NA                   | X                     | 50.514/-4.113 | 0.51                 |
| An2 | <i>Euphrasia anglica</i>     | 2 x 150bp   | 2     | 28.5 |              | 0.85   | 989.23    | -10.75               | 6                     | 51.845/-4.145 | 0.51                 |
| Vi  | <i>Euphrasia vigursii</i>    | 2 x 150bp   | 2     | 42.4 | SAMN14582918 | 0.14   | 1055.93   | 55.95                | X                     | 50.24/-5.381  | 0.54                 |
| Ro  | <i>Euphrasia rostkoviana</i> | 2 x 250bp   | 2     | 67.4 | SAMN14582916 | 1.13   | 1227.92   | 227.94               | 6                     | 55.058/-2.504 | 0.63                 |
| Ri1 | <i>Euphrasia rivularis</i>   | 2 x 150bp   | 2     | 35   | SAMN14582917 | 0.23   | 1126.64   | 126.66               | X                     | 54.534/-3.192 | 0.58                 |
| Ri2 | <i>Euphrasia rivularis</i>   | 2 x 150bp   | 2     | 25.5 |              | 1.41   | 1096.44   | 96.46                | 6                     | 54.513/-3.203 | 0.56                 |
| Ri3 | <i>Euphrasia rivularis</i>   | 2 x 150bp   | 2     | 20.8 |              | 1.41   | 1104.84   | 104.87               | 6                     | 53.082/-4.084 | 0.56                 |

\* Ploi - ploidy, Cov - multiplicity of the monoploid k-mer peak, % het - heterozygosity in %, GS - genome size in Mbp, each as inferred using Tetmer

<sup>†</sup> Sequencing platform: X - Illumina HiSeq X, 6 - Illumina NovaSeq 6000

<sup>‡</sup> Difference in Mbp to reference individual An1

<sup>‡</sup> Converted following Doležel et al. (2003)

167  
168  
169  
170  
171

[end Table 1]

[placeholder] **Table 2**. Pairwise diploid genome size differences (below diagonal) and distance between sampling sites (above diagonal) for all sequencing datasets.

|     | An1    | An2    | Ri1    | Ri2    | Ri3    | Ro     | Vi     |  |
|-----|--------|--------|--------|--------|--------|--------|--------|--|
| An1 |        | 148.06 | 451.36 | 448.94 | 285.62 | 516.74 | 94.91  |  |
| An2 | 10.75  |        | 305.66 | 303.22 | 137.63 | 373.40 | 198.25 |  |
| Ri1 | 126.66 | 137.40 |        | 2.45   | 171.72 | 73.09  | 499.95 |  |
| Ri2 | 96.46  | 107.20 | 30.20  |        | 169.27 | 75.40  | 497.50 |  |
| Ri3 | 104.87 | 115.61 | 21.79  | 8.41   |        | 242.67 | 328.41 |  |
| Ro  | 227.94 | 238.68 | 101.28 | 131.48 | 123.07 |        | 569.66 |  |
| Vi  | 55.95  | 66.70  | 70.71  | 40.51  | 48.92  | 171.99 |        |  |

172  
173

## 2.3 Handling k-mer data

174

### 2.3.1 Generating k-mer data sets and estimating genome sizes

175 Subsequent to read trimming and filtering with fastp v0.22.0 (Chen et al., 2018) with automatic  
176 detection of sequencing adapters in paired-end mode (flag ‘--detect\_adapter\_for\_pe’), we generated  
177 k-mer databases for each sample using the software KMC3 (Kokot et al., 2017). Throughout this  
178 project, we used 21-mers (k-mers of length 21). In order to remove k-mers of organellar origin, we  
179 generated crude *de novo* assemblies of the plastid and mitochondrial genomes using GetOrganelle  
180 (Jin et al., 2020) and generated k-mer databases for each organelle. Designed for sequencing data  
181 sets, KMC3’s default settings exclude k-mers of multiplicity one, which would likely to be due to  
182 sequencing errors. In an assembly, many k-mers will be observed only once. To make all were  
183 included, we ran KMC3 with parameter ‘-ci1’. We then used KMC3 to exclude organellar k-mers  
184 from each sample database.

185

186 For each sample, we generated three uncropped k-mer spectra (i.e., with the upper multiplicity limit  
187 set to 150,000,000, far higher than observed in our data): one for the full (but trimmed and filtered)  
188 read data, one with plastid k-mers removed, and one both with plastid and mitochondrial k-mers  
189 removed. We profiled these datasets using GenomeScope2, Smudgeplot, and Tetmer.

190

191 From these un-cropped, cleaned k-mer spectra we estimated the diploid genome size for each  
192 individual as follows. We discarded the portion of each spectrum with multiplicity less than half the  
193 individual’s monoploid peak multiplicity, which largely correspond to contamination. For the  
194 remaining data, we multiplied the multiplicity and count values. We then took the sum of these  
195 products, and divided by the monoploid multiplicity. For conversion to pg, we followed Doležel et al.  
196 (2003).

197



## 198 2.3.2 Scaling and binning

199 To compare between samples the number of k-mers within each frequency (multiplicity) class, we  
200 had to scale the multiplicity values of our datasets. We determined for each sample the monoploid  
201 ('haploid') k-mer multiplicity using the Tetmer app (<https://github.com/hannesbecher/shiny-k-mers>),  
202 and down-scaled the multiplicity values of each k-mer spectrum accordingly so that the resulting  
203 spectra had their monoploid peaks at 1 (see Fig. 1B and C). The scaled multiplicity values  
204 corresponded to the genome-wide copy number of each k-mer (plus some statistical sampling error  
205 caused by shotgun sequencing). However, because each sample had a different monoploid  
206 multiplicity, the resulting fraction-valued scaled multiplicity values differed between samples. To  
207 compare samples, we binned these scaled multiplicities. Throughout this article, we use the terms  
208 scaled (binned) multiplicity and (genomic) copy number interchangeably.

209  
210 To easily analyse the full range of genomic copy numbers, we decided to use unequal bins,  
211 increasing in size in an exponential fashion. We discarded all scaled multiplicities equal to or less  
212 than 0.5, because these were likely due to contaminants. We then generated bins (copy number  
213 classes) with upper limits 10% larger than their lower limits  $\{(0.5, 0.55], (0.55, 0.605], \dots,$   
214  $(20.57, 22.63], \dots\}$ . The total number of bins used may differ between samples with the highest bin  
215 number corresponding to the highest-copy number k-mer in any dataset. We also generated  
216 alphabetically sorted k-mer dumps with KAT3. These are two-column text files of k-mers and their  
217 respective multiplicity in a dataset. We scaled and binned these dump files.

## 218 2.3.3 Comparing k-mer data sets

219  
220 Using *E. anglica* (An1) as the reference individual and building on data scaled and binned as  
221 described above, we generated two types of sample comparisons: k-mer difference graphs and joint  
222 k-mer spectra.

### 223 2.3.3.1 Difference graphs

224  
225 To quantify how much the k-mer differences in each copy number bin contribute to the overall  
226 genome size difference between two samples, the per-bin differences are multiplied by the expected  
227 copy number of k-mers in each bin. The total genome size difference between two samples can then  
228 be obtained by summing over all per-bin products (analogous to computing the genome size from a  
229 k-mer spectrum). We generated k-mer difference graphs that indicate the contribution of each copy  
230 number bin to the overall genome size difference. This kind of comparison is ignorant of sequence  
231 identity. Difference graphs can also be plotted in a cumulative way with the graph's 'slope'  
232 indicating the contribution to the genome size difference of any one specific bin. Fig. 2 illustrates for  
233 three scenarios how these graphs correspond to the underlying data (here focussing on low-copy  
234 number regions).

235  
236 The scenarios shown in Fig. 2 are: (1) if one sample has a higher heterozygosity than the other (Fig.  
237 2A) but the samples have identical genome sizes, then the high-heterozygosity sample (crosses) will  
238 show a higher 1x peak but a somewhat lower 2x peak than the other sample (circles). The difference  
239 graph for this scenario (Fig. 2D) will show two peaks in opposite directions at 1x and 2x (Fig. 2D,  
240 triangles). The cumulative difference graph (Fig. 2D, stars) will cross the 1x line with a steep slope  
241 indicating a high difference in copy number for 1x k-mers. This is compensated by a steep slope in  
242 the opposite direction for 2x k-mer causing a net genome size difference of 0 (vertical grey line). (2)  
243 if two samples are identical except for some sequence which is absent in one sample but present at  
244 copy number 4 in the other, then one k-mer spectrum will have an additional peak at 4x (Fig. 2B,

245 circles). The corresponding difference graph will show a peak at 4x (Fig. 2E, triangles) and the  
 246 cumulative difference graph will show a steep slope at 4x leading to a non-zero overall difference  
 247 (Fig. 2E, stars). (3) different k-mer datasets may have different peak widths even when generated  
 248 from the same biological sample (technical replicates) depending on the method of library  
 249 preparation and the sequencing platform chosen. Wider peaks tend to be shallower (Fig. 2C, crosses)  
 250 than narrow ones (Fig. 2C, circles). This effect may not be obvious in a binned k-mer spectrum, but it  
 251 does affect difference graphs (Fig. 2F). While not causing the inference of an overall genome size  
 252 difference, the resulting cumulative difference graph shows a downtick followed by a steep increase  
 253 crossing  $x=2$  followed by another decrease back to 0 (Fig. 2F, stars). This pattern would be inverted  
 254 if the samples were swapped.  
 255

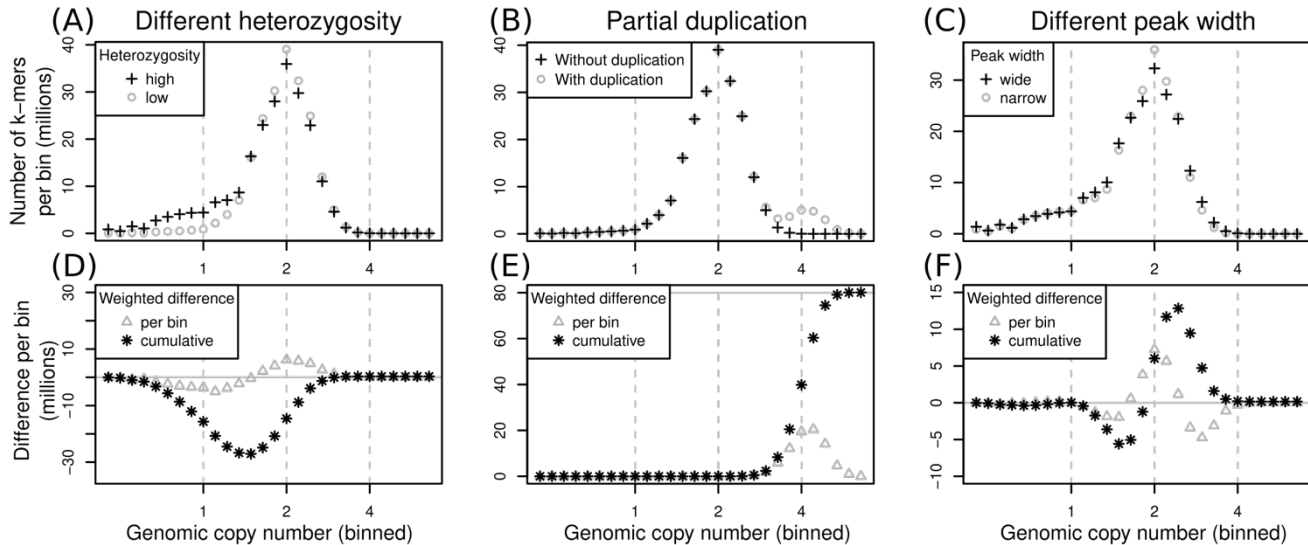

256  
 257

[full width] Figure 2. Schematic of pairs of (binned) k-mer spectra (top row) and their corresponding  
 spectrum difference graphs (bottom row). Three different scenarios are shown in columns: (1) two  
 samples of identical genome size with different heterozygosity levels (A and D), (2) two samples  
 where one contains some additional, duplicated sequence (B and E), and (3) two samples with  
 identical sequences but whose k-mer spectra have different peak widths (C and F). Refer to main text  
 for detailed explanations.

[End legend Fig2.]

264  
 265  
 266  
 267  
 268

### 2.3.3.2 Joint k-mer spectra

269 A joint k-mer spectrum of two samples is a matrix that shows for each k-mer how often it was  
 270 observed in each of two datasets. In this way, a joint spectrum is aware of sequence identity. We  
 271 generated binned joint k-mer spectra by matching up pairs of k-mer dumps (analogous to database  
 272 joins on the k-mer column). We then scaled and binned the counts in these joins, which reduced the  
 273 number of count levels from millions to approximately 150 bins. Finally, we counted the number of  
 274 times that each combination of two bin values occurred, resulting in a three-column table (of count,  
 275 number of bin in reference, and number of bin in other sample), and we converted this table into a  
 276 matrix, the binned joint k-mer spectrum. These joint spectra can be visualized as heatmap plots  
 277 making it possible to show copy number differences between two whole genomes in a single plot.  
 278



279

### 280 2.3.4 Contribution of different repeat types

281 To associate any genomic copy number differences identified using k-mers with specific repeat  
282 types, we used the RepeatExplorer2 output of a previous study (Becher et al., 2021) in which we had  
283 carried out an analysis of low-pass sequencing data of several diploid and tetraploid British  
284 eyebrights. We selected the first 50 repeat super clusters and concatenated, per super cluster, all  
285 contributing reads. We then used the program UniqueKMERS (Chen et al., 2021) to extract from  
286 each concatenated sequence those k-mers that were unique to the corresponding super cluster, and we  
287 turned these into 50 k-mer databases with KMC3. We used these databases to extract from each of  
288 the seven high-coverage datasets 50 subsets of repeat k-mers. Finally, we generated joint k-mer  
289 spectra for each of these subsets and the corresponding data from reference individual *E. anglica*  
290 (An1).

291

## 292 3 Results

### 293 3.1 Genome profiling

294 Our genome profiling revealed k-mer patterns typical for diploid genomes in all our samples (Table  
295 1). The monoploid k-mer coverage of our datasets ranged from 20.8 in *Euphrasia rivularis* (Ri3) to  
296 67.4 in *E. rostkoviana* (Ro). Per-nucleotide heterozygosity as estimated by Tetmer ranged from  
297 0.13% in *E. anglica* (An1) to 1.41% in *E. rivularis* (Ri2 and Ri3). Samples with very low  
298 heterozygosity (such as An1, Vi, and Ri1), containing very few heterozygous k-mer pairs did not  
299 have a noticeable ‘AB’ smudge (Supplemental File S1). Smudgeplot incorrectly suggested  
300 tetraploidy for these samples, while proposing diploidy for all samples with higher levels of  
301 heterozygosity. The spectra’s peak widths (bias parameters) varied considerably between individuals  
302 from 0.9 in Ri2 to 2.4 in Vi.

303

304 By comparing uncropped k-mer spectra before and after removal of organelle sequences, we could  
305 highlight the distributions of organellar k-mers. These had one peak for mitochondrial k-mers (green,  
306 Supplemental File S1), but two for plastid k-mers (red, Supplemental File S1). The high multiplicity  
307 of these peaks indicating the high copy number of organellar genomes compared to the nuclear ones.  
308 The second peak in the plastid-derived k-mers presumably corresponded to the plastid inverted repeat  
309 regions. Using un-cropped spectra with organellar k-mers removed, we estimated the genome sizes of  
310 our samples to range more than 1.2-fold from 989 Mbp in *E. anglica* (An2) to 1227 Mbp in *E.*  
311 *rostkoviana* (Ro). For comparison, without organellar DNA removed, these estimates were 3.8 to  
312 7.2% higher. Despite our modest sample of seven individuals, the individual genome size estimates  
313 showed a clear partitioning by species with ‘species’ accounting for 98.6% of the variation  
314 (ANOVA,  $F_{3,3}=72.43$ ,  $P=0.0027$ ). Repeating the ANOVA on permuted versions of the dataset  
315 showed that this  $P$ -value and proportion of variance explained are unlikely to occur by chance given  
316 a significance cut-off of 5%.

### 317 3.2 Difference graphs

318 We generated cumulative k-mer difference graphs for all samples compared to reference individual  
319 An1 (Fig. 3). These indicated very similar magnitudes of genome size differences to those obtained  
320 from un-binned, un-cropped spectra (Table 2). This suggests that binning, despite reducing the  
321 information content of our data, did not bias our inferences.

322

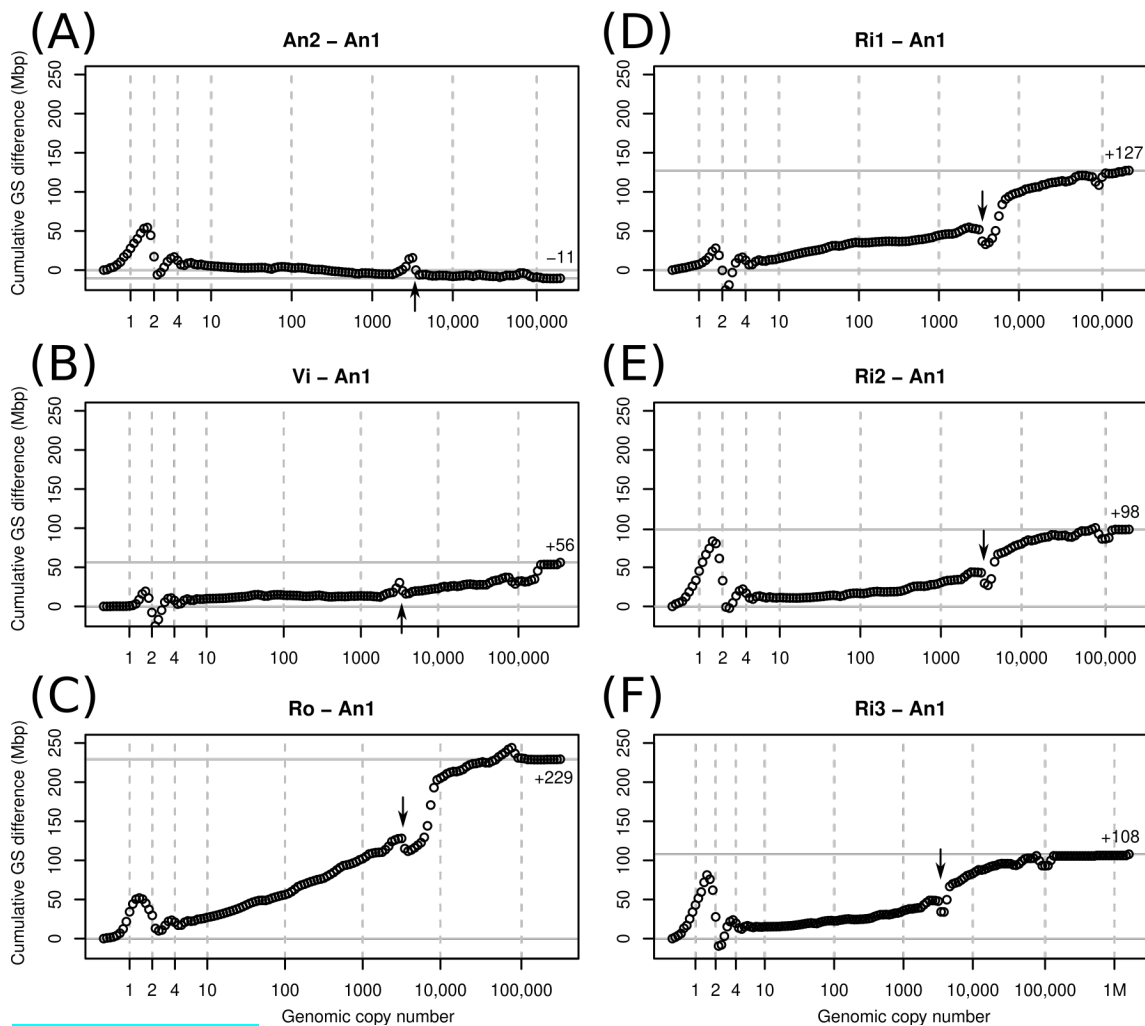

323  
 324 **[full width] Figure 3.** Cumulative k-mer difference graphs of the contributions to genome size  
 325 differences of genome fractions ordered by increasing repetitiveness for six samples of diploid  
 326 *Euphrasia* compared to diploid *Euphrasia anglica* (An1). The numbers on the x-axes indicate the  
 327 genomic copy number bins with 1, 2, and 4 representing haploid, diploid, and ‘duplicated’ sequences.  
 328 The genome size differences are shown on the y-axes, scaled identically for all graphs. The total  
 329 genome size difference between the two samples in each graph is indicated at the right-hand side of  
 330 each plot and by a horizontal grey line. The arrows indicate an anomaly caused by copy number  
 331 variation of a repeat present in approximately 3000 copies in the reference individual. **[End legend**  
 332 **fig3]**

333  
 334 The monoploid copy number regions of our cumulative plots are indicated by a vertical dashed line at  
 335  $x=1$ . These areas of the plots show characteristic differences between low and high-heterozygosity  
 336 samples. When comparing low-heterozygosity *E. vigursii* (Vi, **Fig. 3B**) and *E. rivularis* (Ri1, **Fig.**  
 337 **3D**) to the low-heterozygosity reference individual of *E. anglica* (An1), there were no large  
 338 differences in heterozygous k-mer counts (which, by definition, have monoploid copy number in  
 339 diploids) and the curves were flat at  $x=1$ . All other samples had higher levels of heterozygosity than  
 340 the reference individual causing a positive difference in k-mer count leading to a positive slope where  
 341 the data line intersects with the vertical line at  $x=1$  (**Fig. 3A, C, E and F**). Again, these are cumulative  
 342 plots. If the same data were to be plotted per bin as in Fig. 2, positive slopes would be peaks. All  
 343 samples showed negative slopes where the data line crossed the diploid ( $x=2$ ) and duplication ( $x=4$ )

344 copy number bins. By time the cumulated data series reached  $x=10$  there were no strong up or  
345 downticks and all samples had a somewhat higher number of k-mers than the reference individual.  
346

347 Across the rest of the copy number range, all plots changed largely gradually and nearly  
348 monotonically. I.e., across bins, k-mer count differences tended to have the same sign for any  
349 individual. An obvious exception from this was a more or less prominent dent in all plots near  
350  $x=3000$  (see arrows in Fig. 3). This pattern is consistent with a repeat of about 3000 copies in the  
351 reference sample (An1) and with different copy numbers in the other samples. If a sample contained  
352 a lower copy number of this repeat than the reference, then it showed an excess of repeat k-mers at  
353 lower copy number followed by a drop at  $x=3000$  as seen in An2 (Fig. 3A) and Vi (Fig. 3B). If,  
354 however, a sample contained more copies of this repeat than the reference, then the plots showed a  
355 deficiency at  $x=3000$  and a subsequent excess as seen in all other samples (Fig. 3C-F). There was a  
356 similar, but less pronounced anomaly at approximately  $x=100,000$  in most plots.  
357  
358

### 359 3.3 Joint k-mer spectra and repeat types

360 To assess the contribution to genome size differences of individual genomic repeats, we matched up  
361 k-mers from our samples with k-mers *Euphrasia*-specific to genomic repeats. We used the 50 largest  
362 repeat super clusters identified in a previous study. Collectively, these accounted for approximately  
363 50% of the *Euphrasia* genomes, and the smallest of these superclusters corresponded to a genome  
364 proportion of approximately 0.06%. Across samples, the variation in k-mers associated with these  
365 repeats accounted for 57% to 78% of the genome size differences observed. Because we used only k-  
366 mers unique to individual super clusters, this is likely an underestimate. The only exception was the  
367 difference between the *E. anglica* individuals (An2-An1) where the difference in repeat-associated k-  
368 mers exceeded the overall genome size difference by 9%. The fact that the An2 genome was larger  
369 than predicted based on repeat k-mers suggests that it contained an excess of lower-copy number k-  
370 mers compared to the reference individual An1.  
371

372 Plotting joint k-mer spectra as heatmaps (Fig. 4) allowed us to investigate in more detail how k-mer  
373 fractions associated with genomic repeats differed between samples. *E. anglica* (An1) served as  
374 reference (along the x axis) in all comparisons. Fig. 4A shows the comparison of all genomic k-mers  
375 between Ro and An1. The high heterozygosity of sample Ro showed as dark blue colour at  $y=1$  with  
376 the highest counts at  $y=1$  and  $x=2$  indicating that most k-mers found at heterozygous sites in Ro are  
377 present in two copies in An1. There is no corresponding high density of k-mers at  $x=1$  and  $y=2$ ,  
378 which agrees with our previous finding of An1 being a low-heterozygosity individual. In the higher-  
379 copy number ( $>1000$ ) regions of the plot, high k-mer densities are found above the diagonal line,  
380 indicating higher repeat copy numbers in Ro than An1.  
381

382 The repeats with the largest variation between samples in their contribution to genome size were  
383 super clusters 1, 4, and 2, which correspond to a Copia transposable element of the family Angela  
384 (Fig. 4B), the 45S rDNA, and a 145-bp satellite repeat, respectively. Plotting joint k-mer spectra for  
385 individual repeat types, we could match the anomalies seen in the cumulative difference graphs (Fig.  
386 3). The dent at  $100,000x$  corresponds to the 145bp-satellite (Fig. 4C) and the dent at  $3000x$  to the 45S  
387 rDNA (Fig. 4D). While the latter two panels contain numerous lower-copy number k-mers in shades  
388 of green, yellow, and red, the genome size differences caused by these repeats are accounted for by  
389 clusters of high-copy number k-mers located off the diagonal line (indicated by arrows).  
390

391  
392

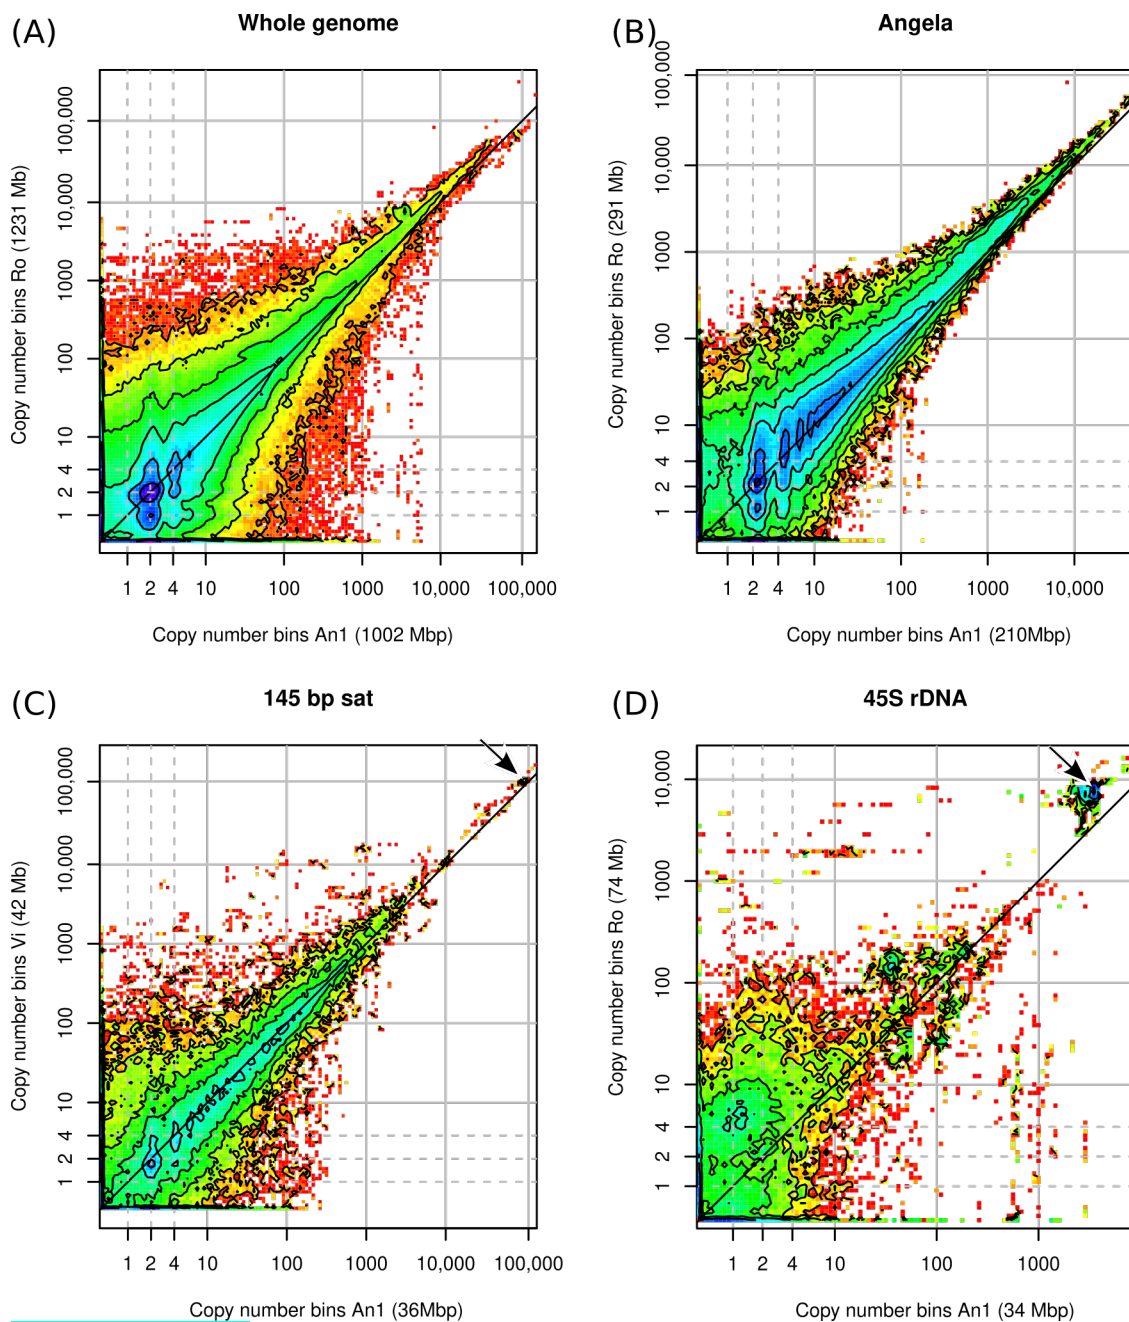

393  
394 [full width]Figure 4. Heatmaps of binned joint k-mer spectra. Copy number bins of the reference  
395 individual are shown on the x-axis. The axis labels show in parentheses the contribution of the k-mer  
396 fraction depicted to each individual's overall genome size. The dashed grey lines indicate haploid,  
397 diploid and 'duplicated' copy numbers. The dark grey diagonal line in each plot indicates the zone  
398 where copy numbers are equal between the samples. The arrows in panels (C) and (D) indicate k-mer  
399 clusters responsible for the anomalies in Fig. 3.

400  
401

### 402 3.4 The importance of different copy number ranges

403 To assess which genomic copy number ranges contribute to the overall genome size of an individual,  
 404 we binned our k-mer spectra even more coarsely. Fig. 5A shows that for all individuals, that the copy  
 405 number range 0-10 contained the majority of genomic k-mers. The next three copy number ranges,  
 406 10-100, 100-1000, and 1000-10,000 contained similar amounts of k-mers, each usually less than half  
 407 the amount of the 0-10 range. The higher copy number ranges were all smaller. For comparison, we  
 408 highlighted the contributions to each copy number range of the three largest repeat super clusters 1,  
 409 2, and 4 (super cluster 3 corresponded to plastid DNA, which we had removed from our data sets).

410

411 While the bulk of the samples' genomes were accounted for by low-copy number sequences (Fig.  
 412 5A), we found that the range contributing most to genome size differences was that of 1000-10,000  
 413 copies. Most of the differences in this range were driven by sample differences in Angela and 45S  
 414 rDNA k-mers (Fig. 5B).

415

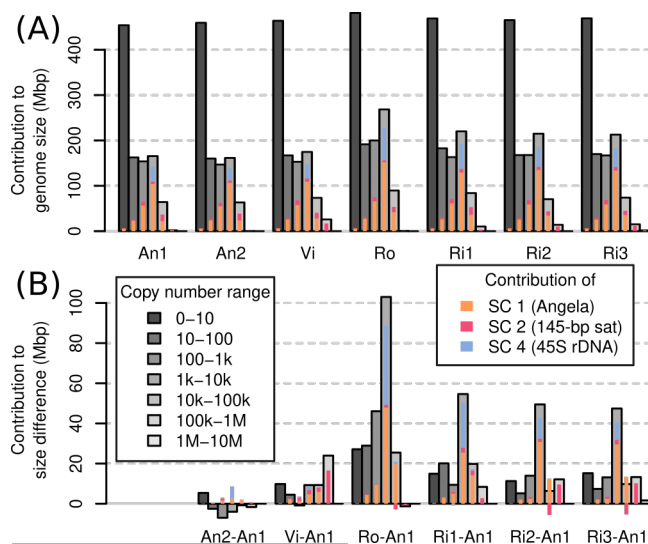

416

417 [half page width] Figure 5. Contribution to overall genome size (A) and genome size differences (B)  
 418 of genomic copy number ranges. The contributions of repeat super clusters 1, 2, and 4 are indicated  
 419 in colour.

420 [end legend fig 5]

421

## 422 4 Discussion

423 In this study, we developed an approach for studying differences in genomic composition within  
 424 species and between closely related ones, using British eyebrights (*Euphrasia*) as a test case. Rather  
 425 than using genome assemblies or low-pass sequencing data, we compared the contents of genomes  
 426 by means of a k-mer approach, which allowed us to inspect the whole range of genomic copy number  
 427 classes. We found that all copy number classes contributed to genomes size differences with large  
 428 contributions from a few individual repeats notably including an Angela transposable element.  
 429 Below, we compare our approach to other existing methods, we critically assess its robustness, and  
 430 then we turn to what we have learned about eyebright genome evolution.

431

### 432 4.1 Comparison to other approaches

433 The content of two or more genomes may be compared in several ways. Perhaps to most obvious is  
 434 to use whole-genome alignments, which has been practiced for more than two decades (Chinwalla et



435 al., 2002; Armstrong et al., 2020). Such studies have revealed how genome structure changes over  
436 time, for instance following hybridization and whole-genome duplication (Chalhoub et al., 2014).  
437 However, most genome assemblies are still not complete, lacking faithful representation of their  
438 repetitive sequences. Such sequences are commonly represented in collapsed form or are missing  
439 (remaining ‘invisible’) due to the problem of assembling repeats comprising monomers longer than  
440 the sequencing read length. Also, genome assemblies usually attempt to represent in one sequence  
441 the two (or more) genome copies present in an individual, which may differ in size. Assembly-based  
442 approaches are thus unlikely to comprehensively answer the question of genome size differences.  
443 Nonetheless, pangenome studies, which compare multiple genomes of closely related species or  
444 individuals, have ubiquitously shown that there is structural variation in populations and between  
445 closely related species including presence/absence variation of low-copy number sequences (Golicz  
446 et al., 2016; Gordon et al., 2017; Hübner et al., 2019).

447  
448 An alternative approach, focusing only on high-copy number sequences, is the analysis of low-pass  
449 genome sequencing data (‘genome skimming’). Because most eukaryote genomes contain more  
450 repeats than low-copy number sequences, genome skimming studies can reveal sequences with major  
451 contributions to genome size differences. A popular method is RepeatExplorer2 (Novák et al., 2010,  
452 2013, 2020b), which takes a set of short low-pass shotgun sequencing reads, constructs clusters of  
453 similar reads, and assembles from these repeat consensus sequences. The repeat clusters are then  
454 annotated using a curated database. RepeatExplorer2 can also analyse multi-individual datasets to  
455 compare the genome composition of multiple samples, usually of different species. Without the need  
456 for a genome assembly, such studies have convincingly shown differences between species in repeat  
457 patterns, and plausibly linked these to genome size differences (Ågren et al., 2015; Macas et al.,  
458 2015). However, genome skimming studies by design miss single- and low-copy number regions,  
459 which also contribute to genome size difference between individuals (Lower et al., 2017).

460  
461 The approach we chose here may be categorised as a ‘genome profiling’ method, where the  
462 properties of genomes are investigated by means of k-mers using moderately high-coverage  
463 sequencing data, but in absence of a genome assembly. Other genome profiling methods have been  
464 developed to assess assembly completeness (KAT; Mapleson et al., 2016), sequence contamination  
465 and heterozygosity (GenomeScope; Vurture et al., 2017), ploidy (Smudgeplot; Ranallo-Benavidez et  
466 al., 2020), and to estimate population parameters (Tetmer; Becher et al., 2020). Unlike these single-  
467 individual methods, we compared pairs of samples, generating joint k-mer spectra – matrices that  
468 simultaneously show the copy number of k-mers in two samples. K-mer multiplicities of individual  
469 samples tend to range from one to several millions. Squaring this number, a full joint k-mer spectrum  
470 would be too large to handle computationally.

471  
472 A key aspect of our approach was to bin multiplicity levels, reducing what would be huge un-  
473 cropped joint k-mer spectra to matrices of approximately 150×150 bins without losing relevant  
474 information. We used these binned joint spectra to compare copy number differences in genome  
475 sequences of any copy number, from heterozygous and homozygous single-copy regions (Fig. 4A,  
476 blue areas) to satellite repeats (copy number > 100,000, Fig. 4C).

## 479 4.2 Measuring genome size differences with k-mers

480 Knowing about the shortcomings of genome assemblies, which tend to be smaller than genomes size  
481 estimates obtained by flow cytometry (Bennett et al., 2003), we utilized a k-mer approach in this

482 study. Despite this, we found our bioinformatic genome size estimates were all lower (except for Ro,  
483  $1C=0.63$  pg) than those we obtained earlier by flow cytometry (Becher et al., 2021), the lowest of  
484 which was  $1C=0.6$  pg. While possible, it seems unlikely that most of our samples truly contained less  
485 DNA than all samples analysed in our previous study.

486  
487 The discrepancy between expected and observed genome size values could not be due to  
488 contaminations with non-target DNA, which would have increased, not reduced our estimates. The  
489 fact that we removed from our datasets k-mers found in organelle genomes, might wrongly have  
490 removed nuclear sequences of organelle origin such as NUMTs or NUPTs, which are known to exist  
491 in the family Orobanchaceae (Cusimano and Wicke, 2016), thus biasing downwards our estimates.  
492 However these sequences usually account for negligible amounts of the nuclear genome (Hazkani-  
493 Covo et al., 2010; Lloyd et al., 2012) + Becher in preparation. Another possibility is that our  
494 sequencing data did not contain a faithful representation of the genome contents of our samples. For  
495 instance, it is known that Illumina sequencing technologies tend to show a bias against GC-rich  
496 sequences.

497  
498

### 499 4.3 All frequency classes contribute to eyebright genome size differences

500 We found that all copy number classes contributed to the genome size differences between our  
501 samples. Across most samples, different copy number fractions contributed similar amounts to the  
502 overall genome size difference except for the sequences in the copy number fraction 1000-10,000  
503 (Fig. 4B), many of which were 45S rDNA and thus satellite sequences. We also detected a  
504 considerable contribution to genome size difference of repeat super cluster 2, which was associated  
505 with a 145-bp tandem repeat, possibly a centromeric one, in samples Vi, Ri2, and Ri3 (Fig. 4B).  
506 These observations confirm our hypothesis (1) that satellites contribute in a major way to *Euphrasia*  
507 genome size differences.

508  
509 While all copy number classes contributed to the genome size differences, these contributions did not  
510 correlate well with the proportion that these copy number class contributed to each genome (compare  
511 Fig. 4A and Fig. 4B). For instance, most sequences in all genomes ( $> 400$  Mbp) were low-copy  
512 number sequences, which were proportionally underrepresented among the sequences that cause  
513 genome size differences. This shows that there was not a per se contribution of all sequences across  
514 the board to genome size differences, and we refute our hypothesis (2). However, we cannot exclude  
515 the possibility that recombination between distant repeat copies led to copy number changes across  
516 numerous sequences. This is because different copy number fractions may not be distributed  
517 uniformly along *Euphrasia* chromosomes. For instance, studies on multiple species of grasses have  
518 revealed that genomic repeats and single-copy sequence tend to be located in different regions of the  
519 chromosomes (Barakat et al., 1998) and it has been shown the gene density in bread wheat increases  
520 along chromosomes with increasing distance from centromeres (Akhunov et al., 2003). Although this  
521 pattern is not universal (Lang et al., 2018), if it was to hold in *Euphrasia*, structural variation caused  
522 by recombination between transposable elements might affect repeat sequences disproportionately  
523 more than low-copy number sequences.

524  
525 Finally, all samples contained more low-copy DNA (copy number  $< 10$ ) than the reference individual  
526 *E. anglica* (An1), ranging from an additional 5 to 27 Mbp at the diploid level. Although this is  
527 modest compared to the overall genome size differences between samples, it shows that there is a  
528 considerable contribution to genome size differences from low-copy number sequences, which

529 confirms our hypothesis (3). This finding also calls for a *Euphrasia* pangenome study to assess the  
530 differences in gene space between *Euphrasia* individuals, which we currently working on.  
531

#### 532 **4.4 Genome comparisons and our understanding of diploid British *Euphrasia***

533 British *Euphrasia* have become known for their taxonomic complexity. While the diploids are largely  
534 morphologically distinct from one another (although numerous diploid hybrid combinations are  
535 known), they cannot be distinguished reliably by ITS or plastid barcoding (Wang et al., 2018),  
536 raising the question whether they are genetically distinct. Adding to this doubt, we have also recently  
537 uncovered considerable intra and interspecific genome size variation within *Euphrasia* ploidy levels  
538 and showed that ‘population’ is a far better predictor of an individual’s genome size than ‘species’  
539 (Becher et al., 2021). As such, our current working hypothesis has been that *Euphrasia* species may  
540 not show genome-wide differentiation, and instead species differences may be maintained by few  
541 genomic regions under strong selection while the rest of the genome experiences homogenising gene  
542 flow.  
543

544 These previous findings contrast with our results here, which indicated that genome size is predicted  
545 well by morphological species identity and that there are considerable copy number differences in  
546 Angela transposable elements between species. Transposable elements are generally thought to show  
547 lower rates of copy number change than other genomic repeats and they tend to be dispersed  
548 throughout genomes. Divergence in TE copy number might thus indicate genome-wide divergence  
549 between the diploid species of British *Euphrasia*. This divergence may not show in the ITS  
550 sequences, which due to their repetitive nature tend to show a different turnover behaviour than other  
551 nuclear loci. A possible genetic divergence between species may also be missed when analysing  
552 plastid sequences, which tend to have lower substitution rates and effective population sizes and thus  
553 may not show divergence (Ennos et al., 1999). Introgression (or ‘capture’) of plastid genomes is  
554 another increasingly reported phenomenon, which might conceal any existing differentiation in the  
555 nuclear genomes. Being mindful of our sampling design, this may be seen as further evidence for  
556 diploid British *Euphrasia* being more distinct species than their tetraploid relatives (French et al.,  
557 2008).  
558  
559

#### 560 **5 Funding**

561 This work was funded by NERC grants (NE/R010609/1; NE/L011336/1; NE/N006739/1) awarded to  
562 ADT.

#### 563 **6 Acknowledgments**

564 We thank the members of the University of Edinburgh’s Genetics Journal Club for feedback on the  
565 project. We thank Chay Graham, Kamil Jaron, and Lucía Campos-Dominguez for comments on an  
566 earlier version of the manuscript. We also thank Edinburgh Genomics for generating Illumina  
567 sequencing data. We thank Chris Metherell for sample identification.

#### 568 **7 References**

569 Abad, J. P., Carmena, M., Baars, S., Saunders, R. D., Glover, D. M., Ludeña, P., et al. (1992).  
570 Dodeca satellite: a conserved G+C-rich satellite from the centromeric heterochromatin of

- 571 *Drosophila melanogaster*. *Proc. Natl. Acad. Sci.* 89, 4663–4667. doi:10.1073/pnas.89.10.4663.
- 572 Achigan-Dako, E. G., Fuchs, J., Ahanchede, A., and Blattner, F. R. (2008). Flow cytometric analysis  
573 in *Lagenaria siceraria* (Cucurbitaceae) indicates correlation of genome size with usage types  
574 and growing elevation. *Plant Syst. Evol.* 276, 9. doi:10.1007/s00606-008-0075-2.
- 575 Ågren, J. A., Greiner, S., Johnson, M. T. J., and Wright, S. I. (2015). No evidence that sex and  
576 transposable elements drive genome size variation in evening primroses. *Evolution (N. Y.)*. 69,  
577 1053–1062. doi:<https://doi.org/10.1111/evo.12627>.
- 578 Akhunov, E. D., Goodyear, A. W., Geng, S., Qi, L.-L., Echalié, B., Gill, B. S., et al. (2003). The  
579 organization and rate of evolution of wheat genomes are correlated with recombination rates  
580 along chromosome arms. *Genome Res.* 13, 753–763. Available at:  
581 <http://genome.cshlp.org/content/13/5/753.abstract>.
- 582 Ambrozová, K., Mandáková, T., Bures, P., Neumann, P., Leitch, I. J., Koblížková, A., et al. (2011).  
583 Diverse retrotransposon families and an AT-rich satellite DNA revealed in giant genomes of  
584 *Fritillaria* lilies. *Ann. Bot.* 107, 255–268. doi:10.1093/aob/mcq235.
- 585 Armstrong, J., Hickey, G., Diekhans, M., Fiddes, I. T., Novak, A. M., Deran, A., et al. (2020).  
586 Progressive Cactus is a multiple-genome aligner for the thousand-genome era. *Nature* 587, 246–  
587 251. doi:10.1038/s41586-020-2871-y.
- 588 Ávila Robledillo, L., Neumann, P., Koblížková, A., Novák, P., Vrbová, I., and Macas, J. (2020).  
589 Extraordinary sequence diversity and promiscuity of centromeric satellites in the legume tribe  
590 Fabeae. *Mol. Biol. Evol.* 37, 2341–2356. doi:10.1093/molbev/msaa090.
- 591 Barakat, A., Matassi, G., and Bernardi, G. (1998). Distribution of genes in the genome of  
592 *Arabidopsis thaliana* and its implications for the genome organization of plants. *Proc. Natl.*  
593 *Acad. Sci.* 95, 10044 LP – 10049. doi:10.1073/pnas.95.17.10044.
- 594 Becher, H., Brown, M. R., Powell, G., Metherell, C., Riddiford, N. J., and Twyford, A. D. (2020).  
595 Maintenance of Species Differences in Closely Related Tetraploid Parasitic Euphrasia  
596 (*Orobanchaceae*) on an Isolated Island. *Plant Commun.* 1, 100105.  
597 doi:10.1016/j.xplc.2020.100105.
- 598 Becher, H., Ma, L., Kelly, L. J., Kovařík, A., Leitch, I. J., and Leitch, A. R. (2014). Endogenous  
599 pararetrovirus sequences associated with 24 nt small RNAs at the centromeres of *Fritillaria*  
600 *imperialis* L. (Liliaceae), a species with a giant genome. *Plant J.* 80, 823–833.  
601 doi:10.1111/tpj.12673.
- 602 Becher, H., Powell, R. F., Brown, M. R., Metherell, C., Pellicer, J., Leitch, I. J., et al. (2021). The  
603 nature of intraspecific and interspecific genome size variation in taxonomically complex  
604 eyebrights. *Ann. Bot.* 128, 639–651. doi:10.1093/aob/mcab102.
- 605 Bennett, M. D., Leitch, I. J., Price, H. J., and Johnston, J. S. (2003). Comparisons with  
606 *Caenorhabditis* (100 Mb) and *Drosophila* (175 Mb) using flow cytometry show genome size in  
607 *Arabidopsis* to be 157 Mb and thus 25 % larger than the *Arabidopsis* Genome Initiative  
608 Estimate of 125 Mb. *Ann. Bot.* 91, 547–557. doi:10.1093/aob/mcg057.

- 609 Blommaert, J. (2020). Genome size evolution: towards new model systems for old questions. *Proc.*  
610 *R. Soc. B Biol. Sci.* 287, 20201441. doi:10.1098/rspb.2020.1441.
- 611 Chalhoub, B., Denoeud, F., Liu, S., Parkin, I. A. P., Tang, H., Wang, X., et al. (2014). Early  
612 allopolyploid evolution in the post-Neolithic *Brassica napus* oilseed genome. *Science* (80-. ).  
613 345, 950–953. doi:10.1126/science.1253435.
- 614 Charlesworth, B., Sniegowski, P., and Stephan, W. (1994). The evolutionary dynamics of repetitive  
615 DNA in eukaryotes. *Nature* 371, 215–20. doi:10.1038/371215a0.
- 616 Chen, S., He, C., Li, Y., Li, Z., and Melançon III, C. E. (2021). A computational toolset for rapid  
617 identification of SARS-CoV-2, other viruses and microorganisms from sequencing data. *Brief.*  
618 *Bioinform.* 22, 924–935. doi:10.1093/bib/bbaa231.
- 619 Chen, S., Zhou, Y., Chen, Y., and Gu, J. (2018). fastp: an ultra-fast all-in-one FASTQ preprocessor.  
620 *Bioinformatics* 34, i884–i890. doi:10.1093/bioinformatics/bty560.
- 621 Chia, J.-M., Song, C., Bradbury, P. J., Costich, D., de Leon, N., Doebley, J., et al. (2012). Maize  
622 HapMap2 identifies extant variation from a genome in flux. *Nat. Genet.* 44, 803–807.  
623 doi:10.1038/ng.2313.
- 624 Chinwalla, A. T., Cook, L. L., Delehaunty, K. D., Fewell, G. A., Fulton, L. A., Fulton, R. S., et al.  
625 (2002). Initial sequencing and comparative analysis of the mouse genome. *Nature* 420, 520–  
626 562. doi:10.1038/nature01262.
- 627 Creighton, H. B., and McClintock, B. (1931). A correlation of cytological and genetical crossing-  
628 over in *Zea mays*. *Proc. Natl. Acad. Sci. U. S. A.* 17, 492–497. doi:10.1073/pnas.17.8.492.
- 629 Cusimano, N., and Wicke, S. (2016). Massive intracellular gene transfer during plastid genome  
630 reduction in nongreen Orobanchaceae. *New Phytol.* 210, 680–693. doi:10.1111/nph.13784.
- 631 Davison, J., Tyagi, A., and Comai, L. (2007). Large-scale polymorphism of heterochromatic repeats  
632 in the DNA of *Arabidopsis thaliana*. *BMC Plant Biol.* 7, 44. doi:10.1186/1471-2229-7-44.
- 633 Díez, C. M., Gaut, B. S., Meca, E., Scheinvar, E., Montes-Hernandez, S., Eguiarte, L. E., et al.  
634 (2013). Genome size variation in wild and cultivated maize along altitudinal gradients. *New*  
635 *Phytol.* 199, 264–276. doi:10.1111/nph.12247.
- 636 Doležel, J., Bartoš, J., Voglmayr, H., and Greilhuber, J. (2003). Letter to the editor. *Cytometry* 51A,  
637 127–128. doi:10.1002/cyto.a.10013.
- 638 Ennos, R. A., Sinclair, W. T., Hu, X.-S., and Langdon, A. (1999). “Using organelle markers to  
639 elucidate the history, ecology and evolution of plant populations,” in *Molecular Systematics and*  
640 *Plant Evolution*, eds. P. M. Hollingsworth, R. M. Bateman, and R. J. Gornall (London: CRC  
641 Press), 504.
- 642 French, G. C., Ennos, R. A., Silverside, A. J., and Hollingsworth, P. M. (2005). The relationship  
643 between flower size, inbreeding coefficient and inferred selfing rate in British *Euphrasia*  
644 species. *Heredity (Edinb).* 94, 44–51. doi:10.1038/sj.hdy.6800553.



- 645 French, G. C., Hollingsworth, P. M., Silverside, A. J., and Ennos, R. A. (2008). Genetics, taxonomy  
646 and the conservation of British *Euphrasia*. *Conserv. Genet.* 9, 1547–1562. doi:10.1007/s10592-  
647 007-9494-9.
- 648 Golicz, A. A., Bayer, P. E., Barker, G. C., Edger, P. P., Kim, H., Martinez, P. A., et al. (2016). The  
649 pangenome of an agronomically important crop plant *Brassica oleracea*. *Nat. Commun.* 7,  
650 13390. doi:10.1038/ncomms13390.
- 651 Gordon, S. P., Contreras-Moreira, B., Woods, D. P., Des Marais, D. L., Burgess, D., Shu, S., et al.  
652 (2017). Extensive gene content variation in the *Brachypodium distachyon* pan-genome  
653 correlates with population structure. *Nat. Commun.* 8, 2184. doi:10.1038/s41467-017-02292-8.
- 654 Greilhuber, J. (2005). Intraspecific variation in genome size in angiosperms: Identifying its existence.  
655 *Ann. Bot.* 95, 91–98. doi:10.1093/aob/mci004.
- 656 Gussarova, G., Popp, M., Vitek, E., and Brochmann, C. (2008). Molecular phylogeny and  
657 biogeography of the bipolar *Euphrasia* (Orobanchaceae): Recent radiations in an old genus.  
658 *Mol. Phylogenet. Evol.* 48, 444–460. doi:10.1016/J.YMPEV.2008.05.002.
- 659 Hanušová, K., Ekrt, L., Vít, P., Kolář, F., and Urfus, T. (2014). Continuous morphological variation  
660 correlated with genome size indicates frequent introgressive hybridization among  
661 *Diphasiastrum* species (Lycopodiaceae) in Central Europe. *PLoS One* 9, e99552. Available at:  
662 <https://doi.org/10.1371/journal.pone.0099552>.
- 663 Hazkani-Covo, E., Zeller, R. M., and Martin, W. (2010). Molecular poltergeists: Mitochondrial DNA  
664 copies (numts) in sequenced nuclear genomes. *PLoS Genet.* 6, e1000834.  
665 doi:10.1371/journal.pgen.1000834.
- 666 Heitkam, T., Weber, B., Walter, I., Liedtke, S., Ost, C., and Schmidt, T. (2020). Satellite DNA  
667 landscapes after allotetraploidization of quinoa (*Chenopodium quinoa*) reveal unique A and B  
668 subgenomes. *Plant J.* 103, 32–52. doi:<https://doi.org/10.1111/tpj.14705>.
- 669 Heitz, E. (1928). Das Heterochromatin der Moose. I. *Jahrb. Wiss. Bot.* 69, 762–818.
- 670 Heslop-Harrison, J. S., and Schwarzacher, T. (2011). Organisation of the plant genome in  
671 chromosomes. *Plant J.* 66, 18–33. doi:10.1111/j.1365-313X.2011.04544.x.
- 672 Hübner, S., Bercovich, N., Todesco, M., Mandel, J. R., Odenheimer, J., Ziegler, E., et al. (2019).  
673 Sunflower pan-genome analysis shows that hybridization altered gene content and disease  
674 resistance. *Nat. Plants* 5, 54–62. doi:10.1038/s41477-018-0329-0.
- 675 Jiménez-Ruiz, J., Ramírez-Tejero, J. A., Fernández-Pozo, N., Leyva-Pérez, M. de la O., Yan, H.,  
676 Rosa, R. de la, et al. (2020). Transposon activation is a major driver in the genome evolution of  
677 cultivated olive trees (*Olea europaea* L.). *Plant Genome* 13, e20010.  
678 doi:<https://doi.org/10.1002/tpg2.20010>.
- 679 Jin, J.-J., Yu, W.-B., Yang, J.-B., Song, Y., dePamphilis, C. W., Yi, T.-S., et al. (2020).  
680 GetOrganelle: a fast and versatile toolkit for accurate de novo assembly of organelle genomes.  
681 *Genome Biol.* 21, 241. doi:10.1186/s13059-020-02154-5.

- 682 Jones, R. N. (1995). B chromosomes in plants. *New Phytol.* 131, 411–434. doi:10.1111/j.1469-  
683 8137.1995.tb03079.x.
- 684 Kokot, M., Długosz, M., and Deorowicz, S. (2017). KMC 3: counting and manipulating k-mer  
685 statistics. *Bioinformatics* 33, 2759–2761. doi:10.1093/bioinformatics/btx304.
- 686 Koukalova, B., Moraes, A. P., Renny-Byfield, S., Matyasek, R., Leitch, A. R., and Kovarik, A.  
687 (2010). Fall and rise of satellite repeats in allopolyploids of *Nicotiana* over c. 5 million years.  
688 *New Phytol.* 186, 148–160. doi:10.1111/j.1469-8137.2009.03101.x.
- 689 Kovarik, A., Dadejova, M., Lim, Y. K., Chase, M. W., Clarkson, J. J., Knapp, S., et al. (2008).  
690 Evolution of rDNA in *Nicotiana* allopolyploids: A potential link between rDNA  
691 homogenization and epigenetics. *Ann. Bot.* 101, 815–823. doi:10.1093/aob/mcn019.
- 692 Lang, D., Ullrich, K. K., Murat, F., Fuchs, J., Jenkins, J., Haas, F. B., et al. (2018). The  
693 *Physcomitrella patens* chromosome-scale assembly reveals moss genome structure and  
694 evolution. *Plant J.* 93, 515–533. doi:10.1111/tpj.13801.
- 695 Lloyd, A. H., Rousseau-Gueutin, M., Timmis, J. N., Sheppard, A. E., and Ayliffe, M. A. (2012).  
696 “Genomics of chloroplasts and mitochondria,” in *Promiscuous organellar DNA*, eds. R. Bock  
697 and V. Knoop (Dordrecht: Springer Netherlands), 201–221. doi:10.1007/978-94-007-2920-9\_9.
- 698 Long, Q., Rabanal, F. A., Meng, D., Huber, C. D., Farlow, A., Platzer, A., et al. (2013). Massive  
699 genomic variation and strong selection in *Arabidopsis thaliana* lines from Sweden. *Nat. Genet.*  
700 45, 884–890. doi:10.1038/ng.2678.
- 701 Lower, S. S., Johnston, J. S., Stanger-Hall, K. F., Hjelman, C. E., Hanrahan, S. J., Korunes, K., et al.  
702 (2017). Genome Size in North American Fireflies: Substantial Variation Likely Driven by  
703 Neutral Processes. *Genome Biol. Evol.* 9, 1499–1512. doi:10.1093/gbe/evx097.
- 704 Macas, J., Novák, P., Pellicer, J., Čížková, J., Koblížková, A., Neumann, P., et al. (2015). In depth  
705 characterization of repetitive DNA in 23 plant genomes reveals sources of genome size variation  
706 in the legume tribe Fabaeae. *PLoS One* 10, e0143424. Available at:  
707 <https://doi.org/10.1371/journal.pone.0143424>.
- 708 Mapleson, D., Garcia Accinelli, G., Kettleborough, G., Wright, J., and Clavijo, B. J. (2016). KAT: a  
709 K-mer analysis toolkit to quality control NGS datasets and genome assemblies. *Bioinformatics*  
710 33, 574–576. doi:10.1093/bioinformatics/btw663.
- 711 Metherell, C., and Rumsey, F. J. (2018). *Eyebrights (Euphrasia) of the UK and Ireland.*, ed. J.  
712 Edmondson Bristol: Botanical Society of Britain and Ireland.
- 713 Novák, P., Guignard, M. S., Neumann, P., Kelly, L. J., Mlinarec, J., Koblížková, A., et al. (2020a).  
714 Repeat-sequence turnover shifts fundamentally in species with large genomes. *Nat. Plants* 6,  
715 1325–1329. doi:10.1038/s41477-020-00785-x.
- 716 Novák, P., Neumann, P., and Macas, J. (2010). Graph-based clustering and characterization of  
717 repetitive sequences in next-generation sequencing data. *BMC Bioinformatics* 11, 378.  
718 doi:10.1186/1471-2105-11-378.

- 719 Novák, P., Neumann, P., and Macas, J. (2020b). Global analysis of repetitive DNA from  
720 unassembled sequence reads using RepeatExplorer2. *Nat. Protoc.* 15, 3745–3776.  
721 doi:10.1038/s41596-020-0400-y.
- 722 Novák, P., Neumann, P., Pech, J., Steinhaisl, J., and Macas, J. (2013). RepeatExplorer: a Galaxy-  
723 based web server for genome-wide characterization of eukaryotic repetitive elements from next-  
724 generation sequence reads. *Bioinformatics* 29, 792–793. doi:10.1093/bioinformatics/btt054.
- 725 Pellicer, J., Hidalgo, O., Dodsworth, S., and Leitch, I. J. (2018). Genome size diversity and its impact  
726 on the evolution of land plants. *Genes (Basel)*. 9, 88. doi:10.3390/genes9020088.
- 727 Petit, M., Guidat, C., Daniel, J., Denis, E., Montoriol, E., Bui, Q. T., et al. (2010). Mobilization of  
728 retrotransposons in synthetic allotetraploid tobacco. *New Phytol.* 186, 135–147.  
729 doi:https://doi.org/10.1111/j.1469-8137.2009.03140.x.
- 730 Rabanal, F. A., Nizhynska, V., Mandáková, T., Novikova, P. Y., Lysak, M. A., Mott, R., et al.  
731 (2017). Unstable Inheritance of 45S rRNA Genes in *Arabidopsis thaliana*. *G3*  
732 *Genes|Genomes|Genetics* 7, 1201 LP – 1209. doi:10.1534/g3.117.040204.
- 733 Ranallo-Benavidez, T. R., Jaron, K. S., and Schatz, M. C. (2020). GenomeScope 2.0 and Smudgeplot  
734 for reference-free profiling of polyploid genomes. *Nat. Commun.* 11, 1432. doi:10.1038/s41467-  
735 020-14998-3.
- 736 Šmarda, P., Horová, L., Bureš, P., Hralová, I., and Marková, M. (2010). Stabilizing selection on  
737 genome size in a population of *Festuca pallens* under conditions of intensive intraspecific  
738 competition. *New Phytol.* 187, 1195–1204. doi:10.1111/j.1469-8137.2010.03335.x.
- 739 Suda, J., and Leitch, I. J. (2010). The quest for suitable reference standards in genome size research.  
740 *Cytom. Part A* 77A, 717–720. doi:https://doi.org/10.1002/cyto.a.20907.
- 741 Tek, A. L., Song, J., Macas, J., and Jiang, J. (2005). Sobo, a recently amplified satellite repeat of  
742 potato, and its implications for the origin of tandemly repeated sequences. *Genetics* 170, 1231–  
743 1238. doi:10.1534/genetics.105.041087.
- 744 Veltsos, P., Keller, I., and Nichols, R. A. (2009). Geographically localised bursts of ribosomal DNA  
745 mobility in the grasshopper *Podisma pedestris*. *Heredity (Edinb)*. 103, 54–61.  
746 doi:10.1038/hdy.2009.32.
- 747 Vitales, D., Álvarez, I., Garcia, S., Hidalgo, O., Nieto Feliner, G., Pellicer, J., et al. (2020). Genome  
748 size variation at constant chromosome number is not correlated with repetitive DNA dynamism  
749 in *Anacyclus* (Asteraceae). *Ann. Bot.* 125, 611–623. doi:10.1093/aob/mcz183.
- 750 Vurture, G. W., Sedlazeck, F. J., Nattestad, M., Underwood, C. J., Fang, H., Gurtowski, J., et al.  
751 (2017). GenomeScope: fast reference-free genome profiling from short reads. *Bioinformatics* 33,  
752 2202–2204. doi:10.1093/bioinformatics/btx153.
- 753 Wang, X., Gussarova, G., Ruhsam, M., de Vere, N., Metherell, C., Hollingsworth, P. M., et al.  
754 (2018). DNA barcoding a taxonomically complex hemiparasitic genus reveals deep divergence  
755 between ploidy levels but lack of species-level resolution. *AoB Plants* 10,  
756 10.1093/aobpla/ply026. doi:10.1093/aobpla/ply026.

- 757 Yeo, P. F. (1954). The cytology of British species of *Euphrasia*. *Watsonia* 3, 101–108.
- 758 Yeo, P. F. (1956). Hybridization between diploid and tetraploid species of *Euphrasia*. *Watsonia* 3,  
759 253–269.
- 760
- 761
