# Supplementary material for: Measuring the invisible – The sequences causal of genome size differences in eyebrights (Euphrasia) revealed by k-mers
Source: bioRxiv or medRxiv preprint supplement (doi:10.1101/2021.11.09.467866), 2021-11-11

# Supplementary Material

## 1 Supplementary Data

### 1.1 Genome profiling

All k-mer analyses were carried out with  $k=21$ .

#### 1.1.1 An1 – *Euphrasia anglica*

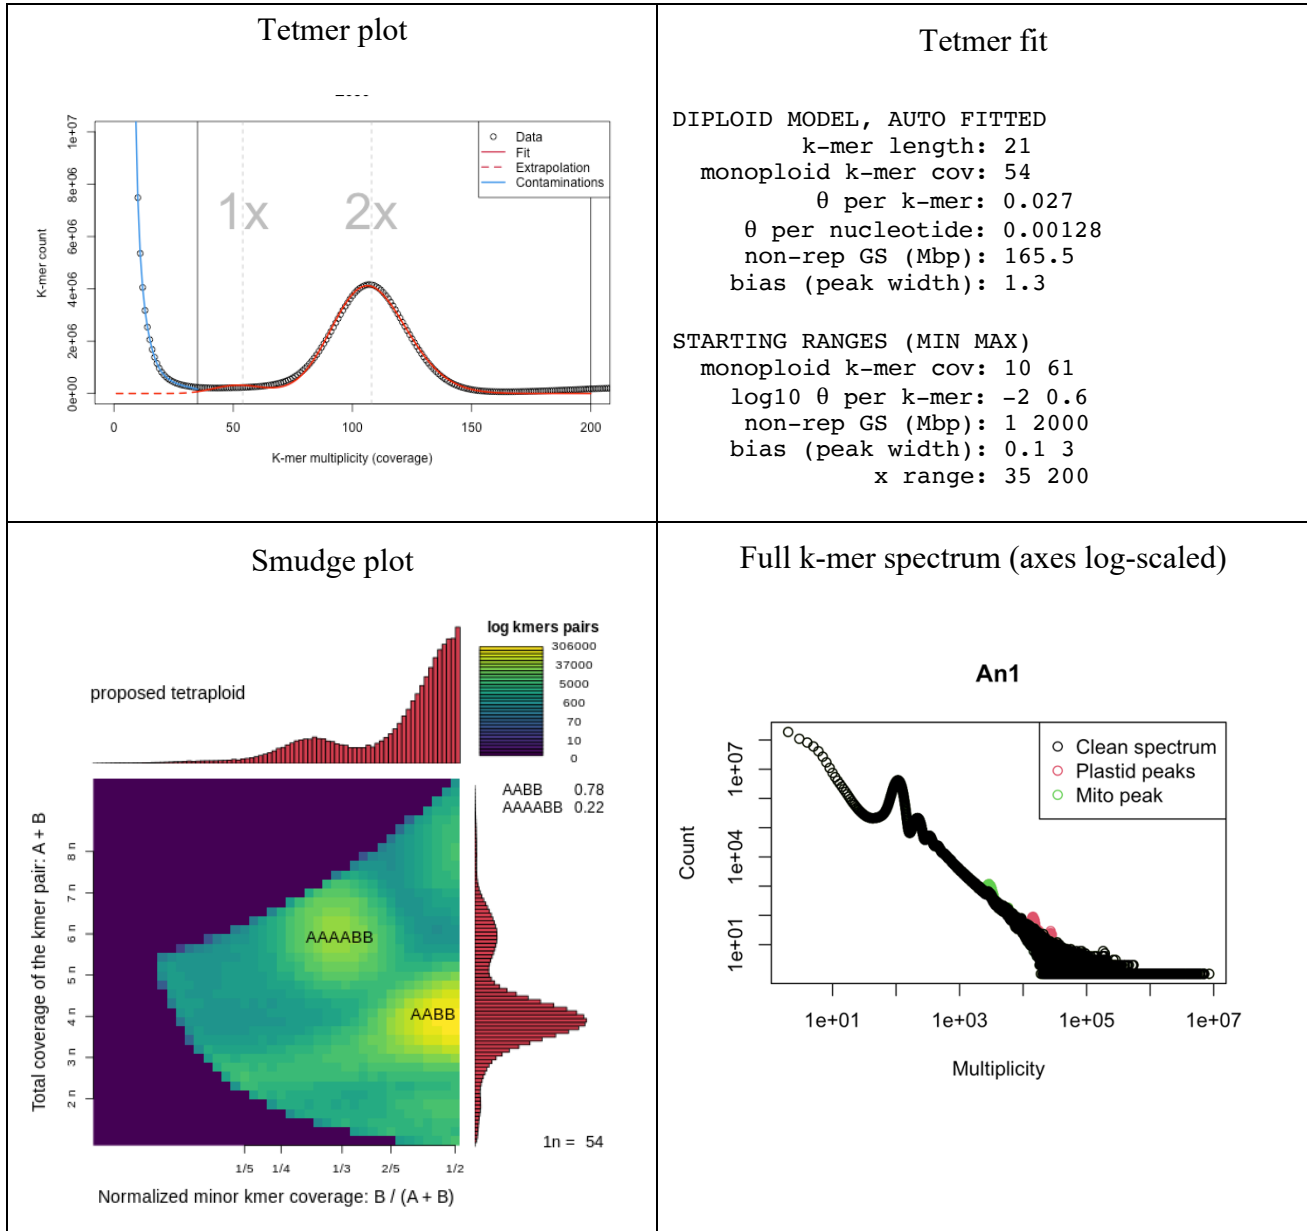

1.1.2 E031 – *Euphrasia vigursii*

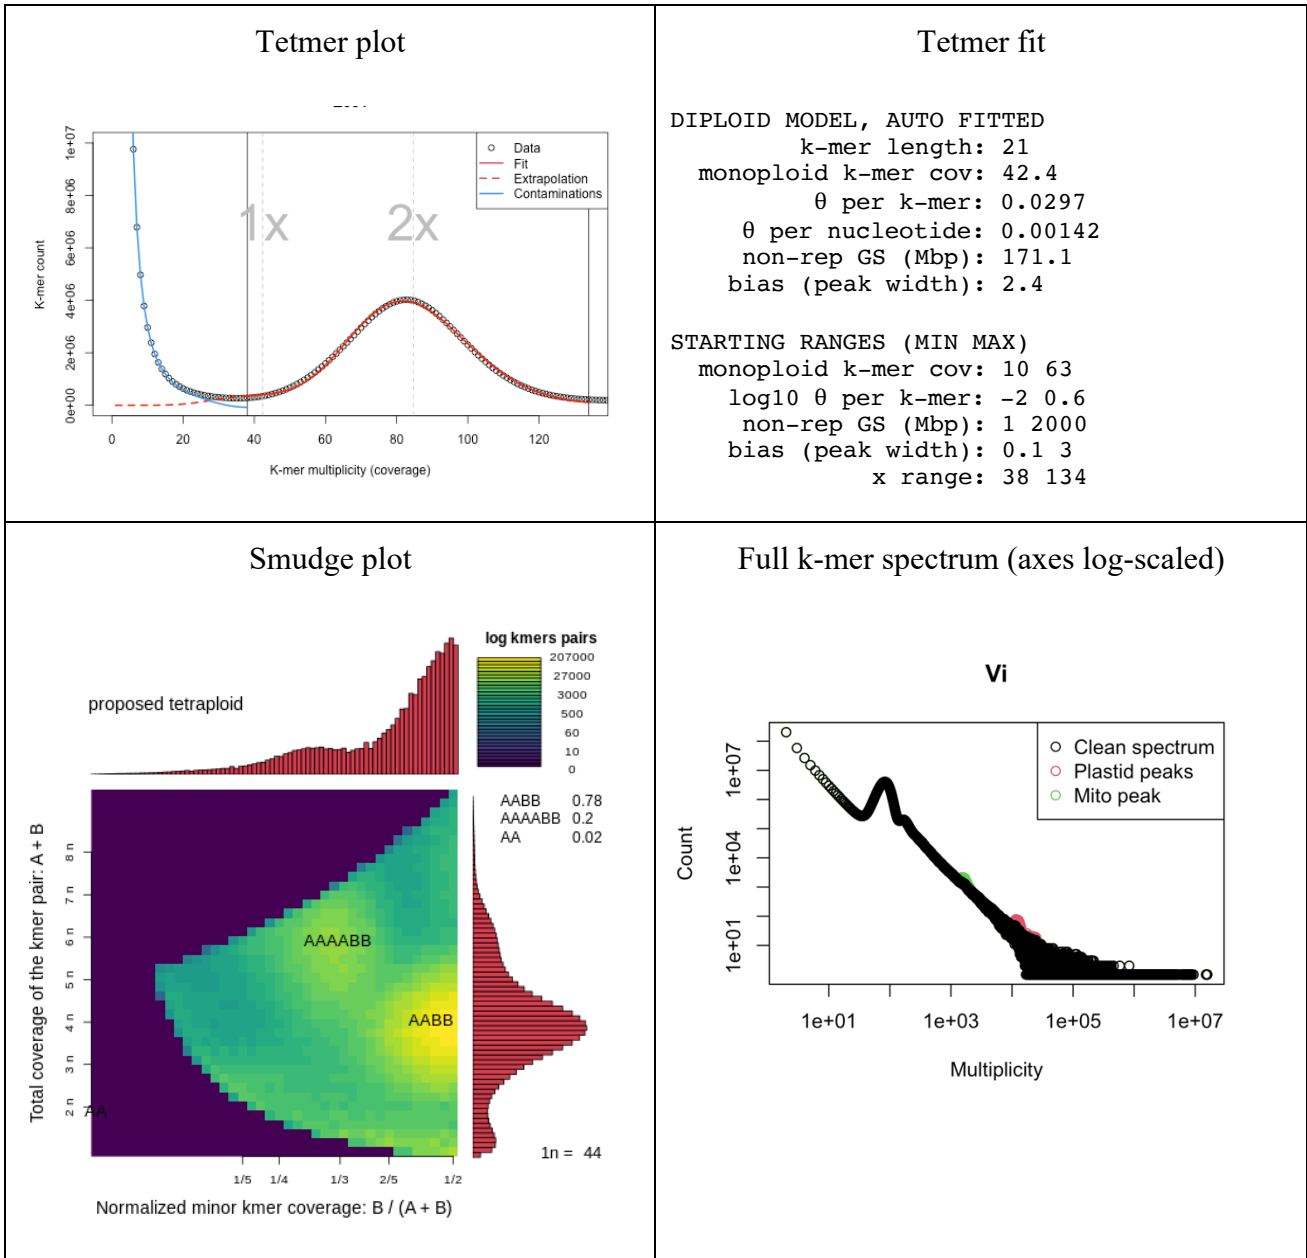

### 1.1.3 E032 – *Euphrasia rivularis*

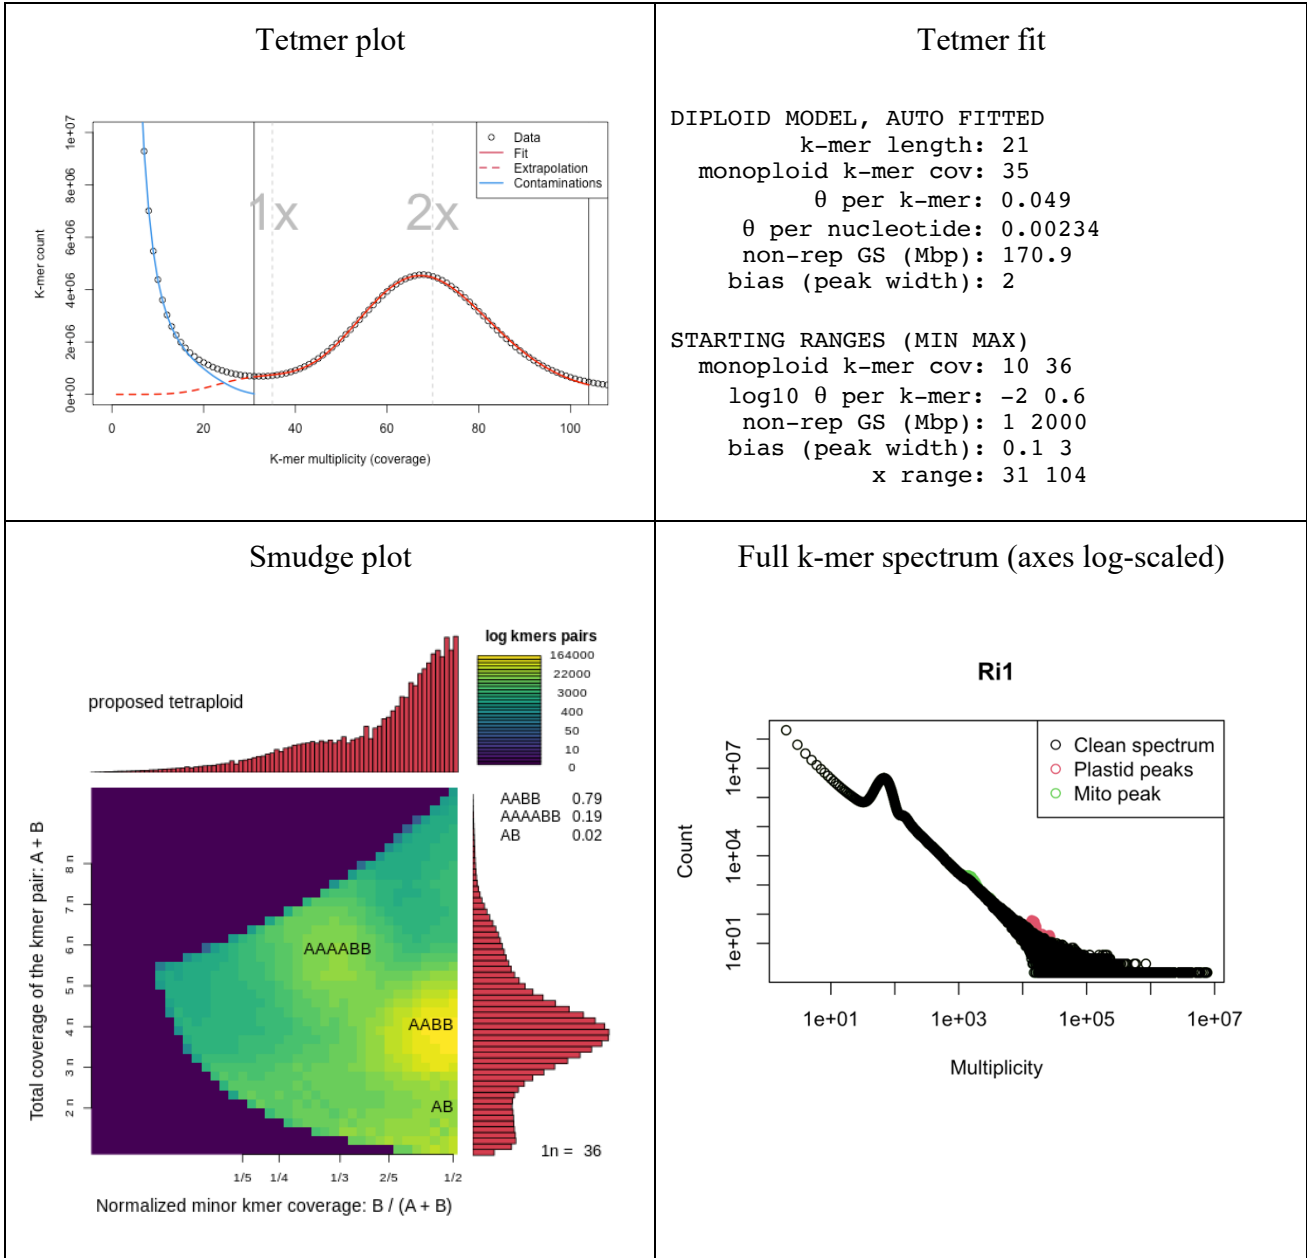

1.1.4 E040 – *Euphrasia rostkoviana*

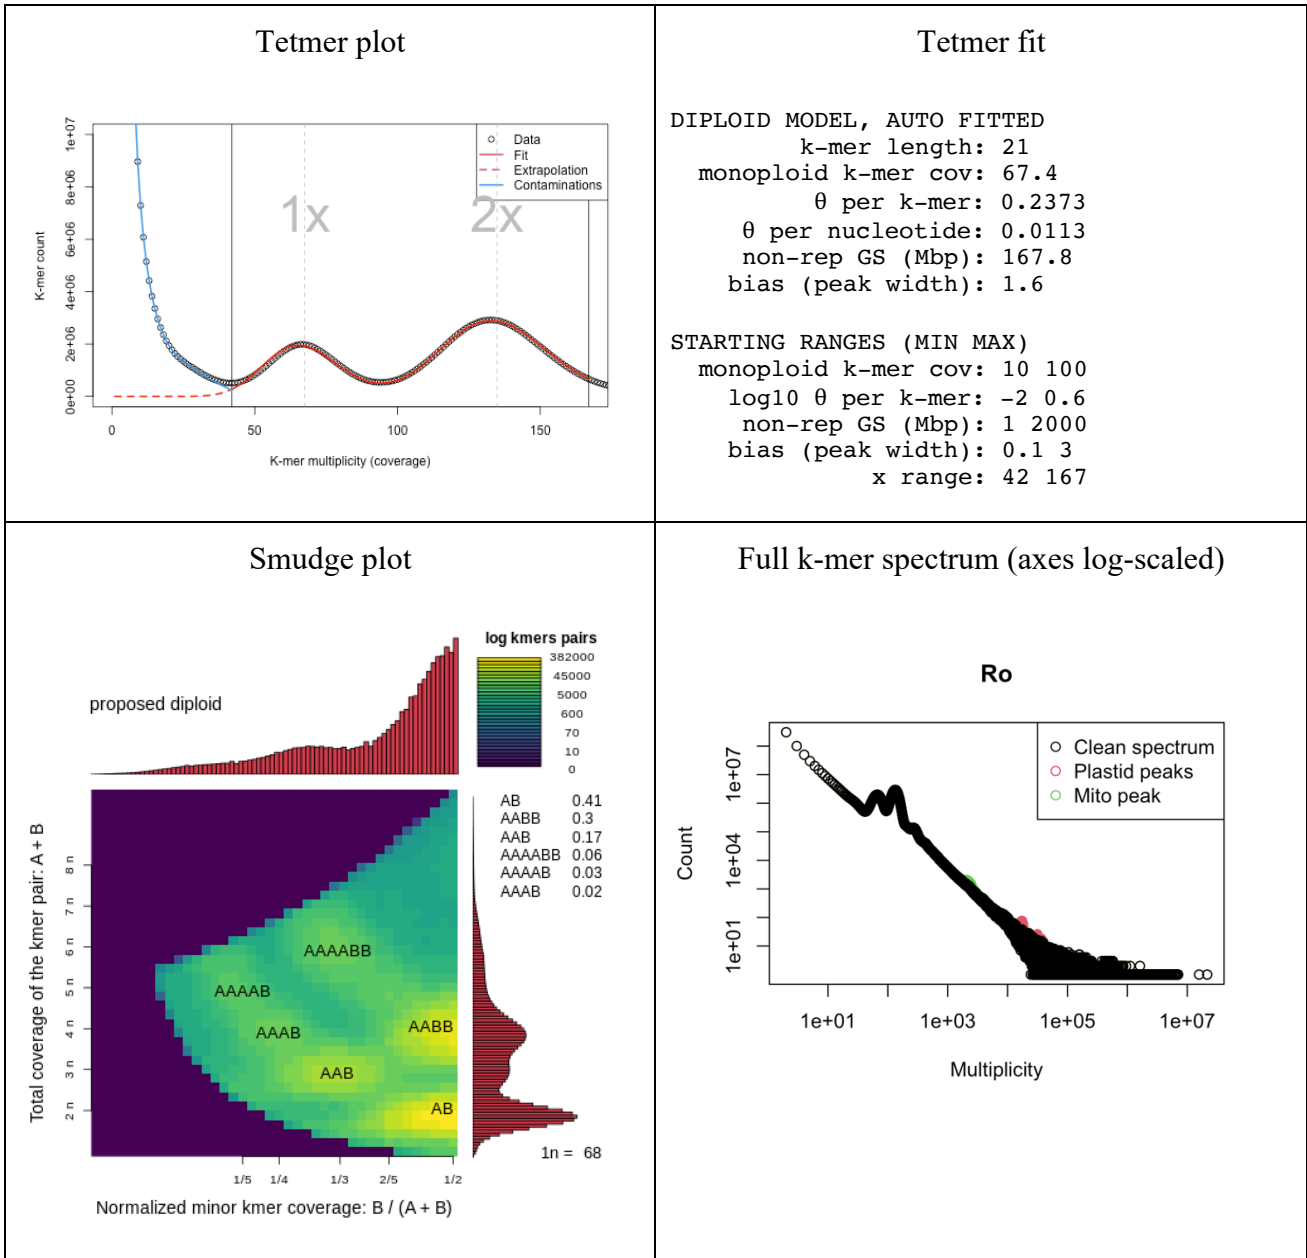

### 1.1.5 An2 – *Euphrasia anglica*

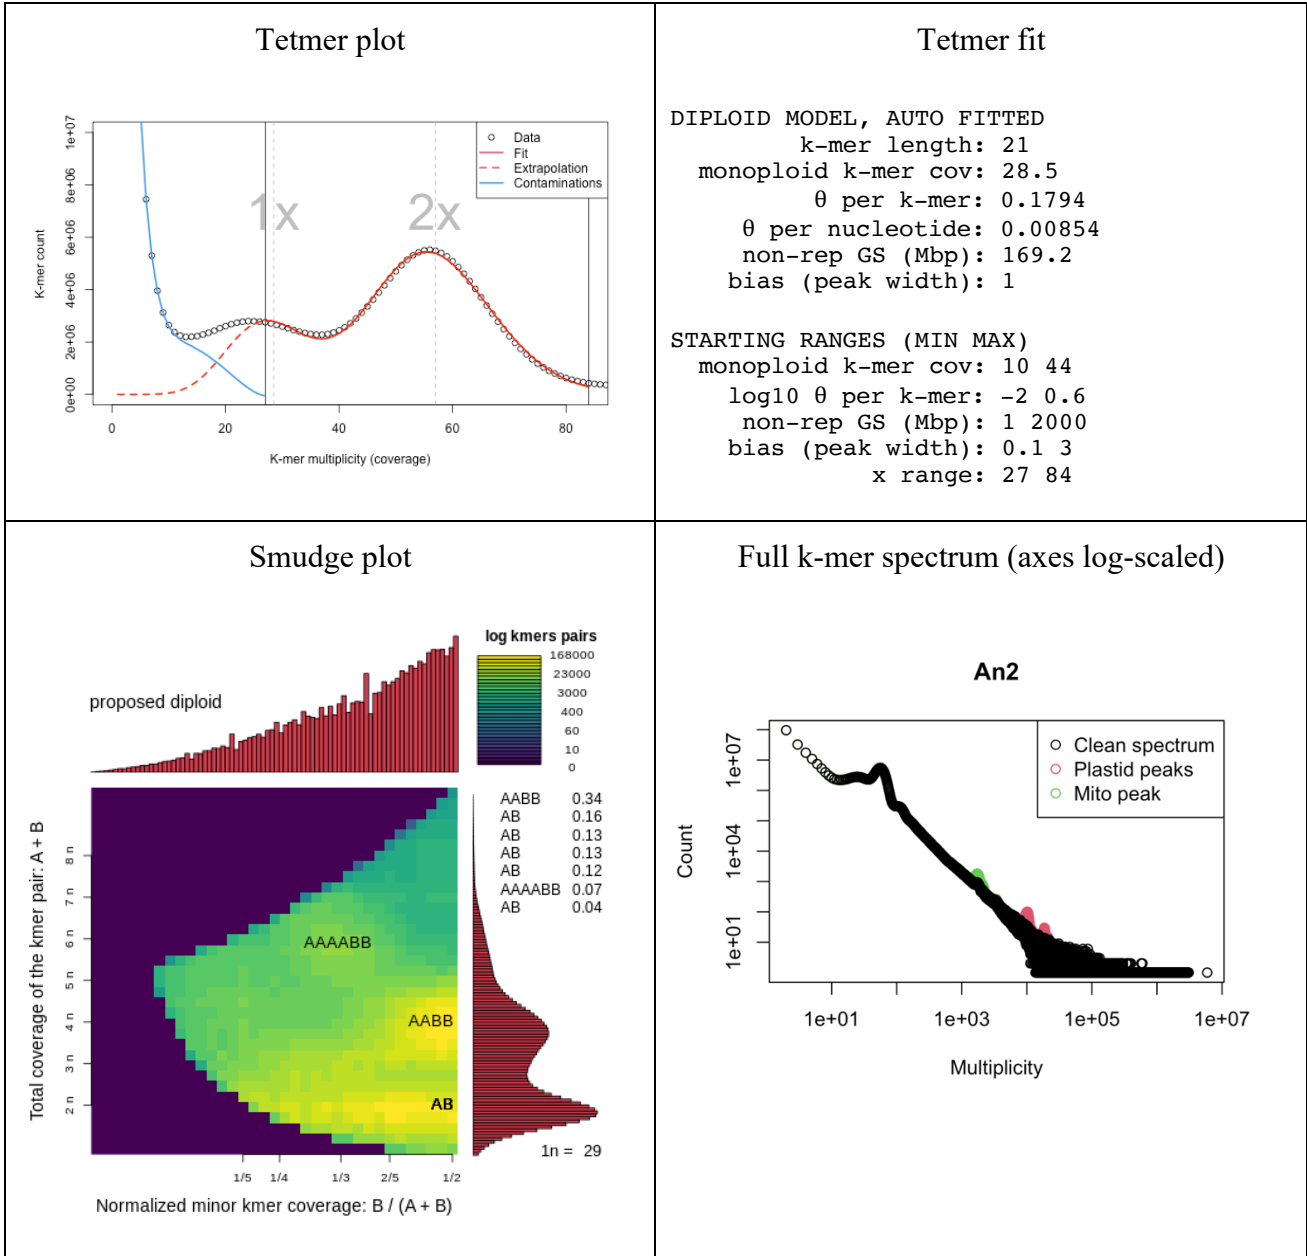

1.1.6 Ri2 – *Euphrasia rivularis*

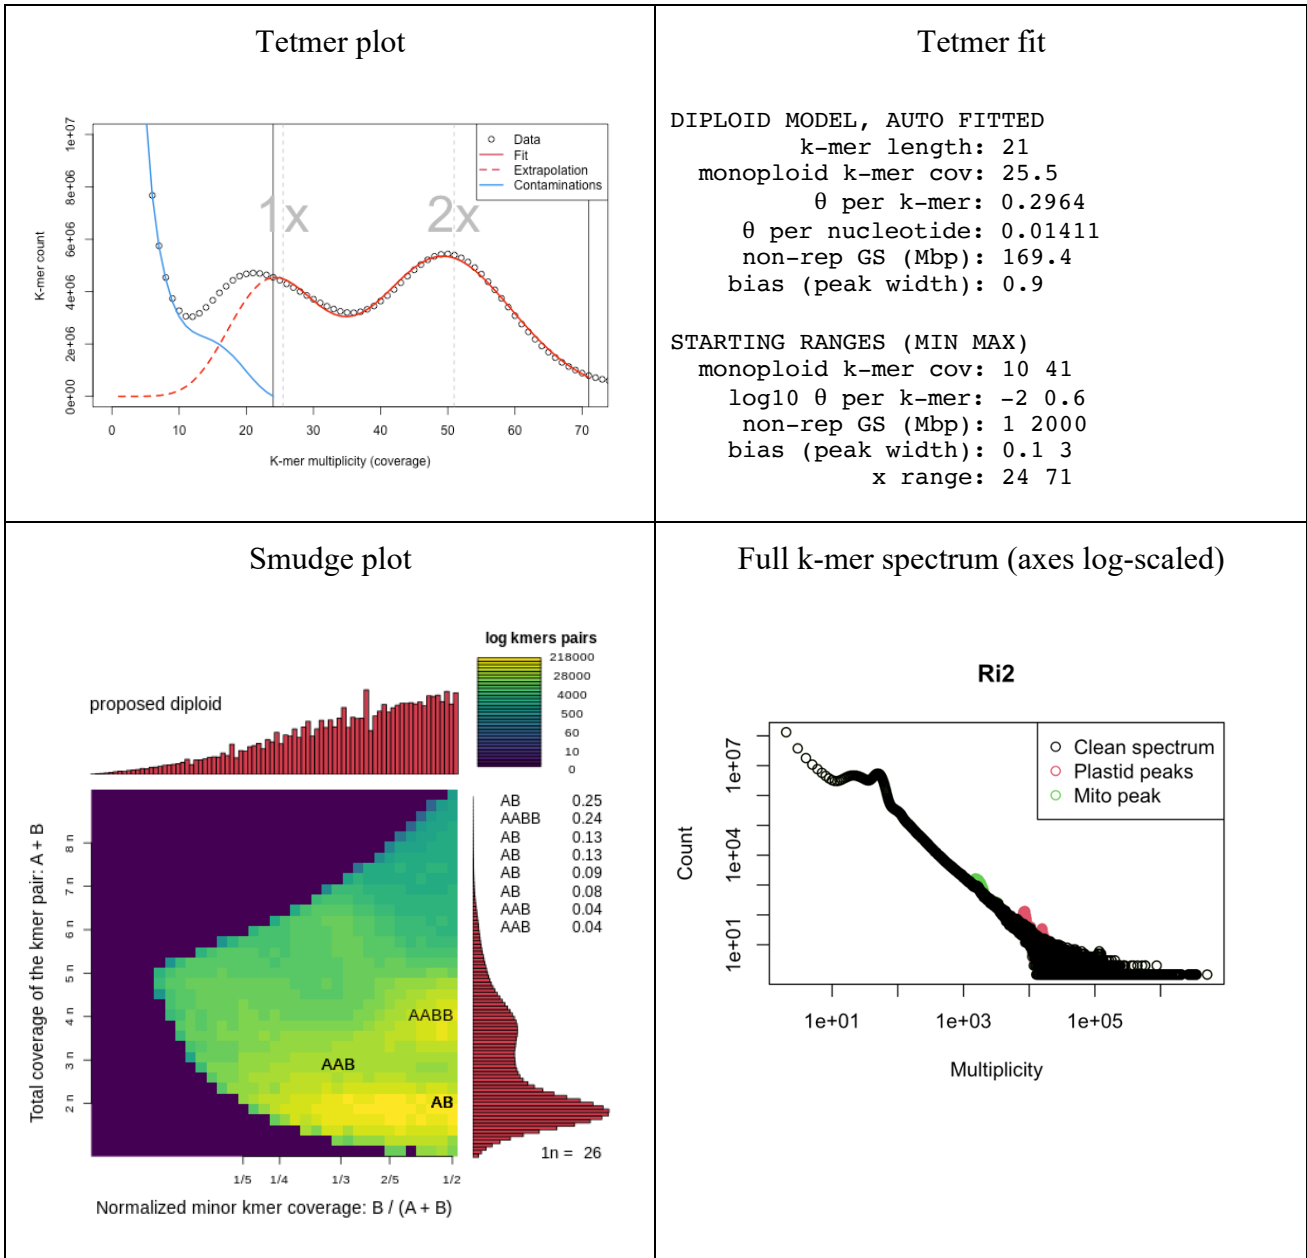

### 1.1.7 Ri3 – *Euphrasia rivularis*

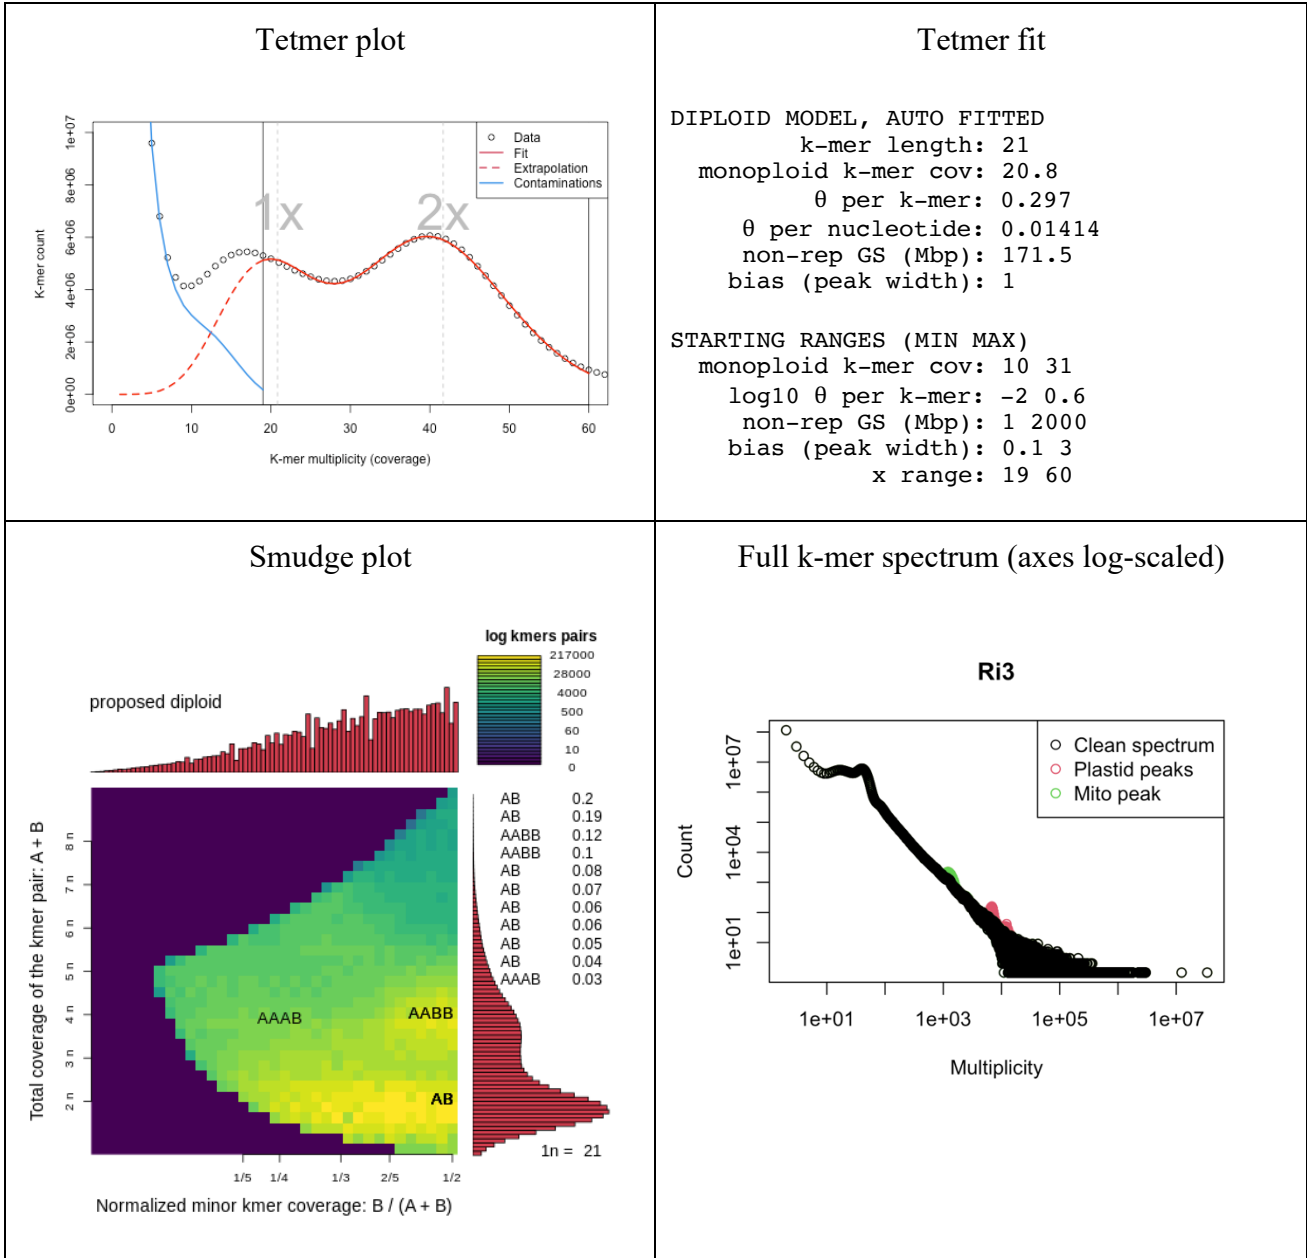

Supplement: Supplementary file [file media-1.pdf]
